# Supplementary material
Source: PubMed Central journal article supplement (PMC5841161)
Supplement: NIHMS917583-supplement-1.pdf [file NIHMS917583-supplement-1.pdf]

**Supplementary Information for: Model projections on the impact of HCV treatment in the prevention of HCV transmission among people who inject drugs in Europe**

Authors: Hannah Fraser; Natasha K Martin; Henrikki Brummer-Korvenkontio; Patrizia Carrieri; Olav Dalgard; John Dillon; David Goldberg; Sharon Hutchinson; Marie Jauffret-Roustide; Martin Kåberg; Amy A Matsler; Mojca Matičič; Havard Midgard; Viktor Mravcik; Anne Øvrehus; Maria Prins; Jens Reimer; Geert Robaey; Bernd Schulte; Daniela K van Santen; Ruth Zimmermann; Peter Vickerman; Matthew Hickman.

**Contents:**

|                            |    |
|----------------------------|----|
| 1. Mathematical Model..... | 1  |
| 2. Model calibration.....  | 12 |
| 3. Results.....            | 29 |
| 4. References.....         | 41 |

## **1. Mathematical model**

We used an adapted mathematical model based on previous modelling which stratifies PWID according to intervention status (on or off OST and NSP, (1)) and infection status (2) to model HCV transmission amongst PWID. The model (Figure 1a in the main paper) includes compartments for susceptible PWID ( $S_{i,j}$ ), chronically infected PWID (antibody positive and RNA positive,  $I_{i,j}$ ), previously infected PWID (antibody positive and RNA negative who are susceptible to re-infection,  $E_{i,j}$ ), PWID on antiviral treatment ( $T_{i,j}$ ) and PWID who have failed treatment ( $F_{i,j}$ ). The model is also stratified by OST/NSP status; off/on OST ( $i = 0$  or  $1$  respectively) and off/on NSP ( $j = 0$  or  $1$  respectively).

All PWID enter the model as susceptible at rate  $\theta$  and become infected at a per capita rate (force of infection  $\lambda_{i,j}$ ) which is elevated by a fixed multiplicative cofactor dependent on OST and NSP status ( $\Gamma$  if on OST only,  $\Pi$  if on NSP only, and  $B$  if on OST and NSP). Once infected, PWID either spontaneously clear infection at rate  $\delta$  and transition to the previously infected group or transition to the chronically infected state at rate  $(1 - \delta)$ . The group of PWID that are previously infected are antibody positive and therefore can be re-infected, again either transitioning to the chronically infected state or spontaneously clearing the infection and remaining in the group they are in. We do not model acute infection because previous modelling has shown it contributes little to transmission (1, 3). Chronically infected PWID can be treated; after treatment (which has duration  $1/\omega$ ) a proportion ( $\alpha$ ) attain a sustained viral response (SVR) and PWID transition to the previously infected group at rate where they can again become infected. However, if SVR is not attained (proportion  $(1 - \alpha)$ ) PWIDs transition to the treatment failure group. In the baseline model treatment failures are not retreated, however once modelling the new Direct Acting Antivirals (DAAs) retreatment of those

that fail treatment is included. We do not include any type of immunity to re-infection following treatment or spontaneous clearance as evidence is unclear about whether the rate of reinfection following spontaneous clearance(4) or treatment(5, 6) is higher or lower than the rate of primary infection, and previous modelling has shown immunity to have little effect on model projections(4, 7, 8). We assume that the risk of infection is proportional to HCV chronic prevalence and do not assume a risk different after treatment. PWID leave the model from every group through either ceasing injecting or through HCV or unrelated mortality.

The model is also stratified by OST/NSP status (Figure 1b in the main paper). All PWID enter the model with no coverage of OST or NSP, and transition onto OST and NSP at rates  $\beta$  and  $\eta$  respectively. PWID stop OST and NSP at rates  $\gamma$  and  $\kappa$  respectively. Further information on how these rates are calibrated are given in the next section.

The full model equations for sites which model **opioid injection only** (Amsterdam, Belgium, Denmark, France, Hamburg, Norway, Scotland and Slovenia) are given by

For PWID not on OST or NSP

$$\frac{dS_{0,0}}{dt} = \theta - \lambda_{0,0}S_{0,0} + \gamma S_{1,0} + \kappa S_{0,1} - (\beta + \eta + \mu_1 + \mu_2)S_{0,0}$$

$$\frac{dE_{0,0}}{dt} = \delta\lambda_{0,0}S_{0,0} - (1 - \delta)\lambda_{0,0}E_{0,0} + \alpha\omega T_{0,0} + \gamma E_{1,0} + \kappa E_{0,1} - (\beta + \eta + \mu_1 + \mu_2)E_{0,0}$$

$$\frac{dI_{0,0}}{dt} = (1 - \delta)\lambda_{0,0}(S_{0,0} + E_{0,0}) - \Phi_{0,0}^1(t) + \gamma I_{1,0} + \kappa I_{0,1} - (\beta + \eta + \mu_1 + \mu_2)I_{0,0}$$

$$\frac{dT_{0,0}}{dt} = \Phi_{0,0}^1(t) + \Phi_{0,0}^2(t) - \omega T_{0,0} + \gamma T_{1,0} + \kappa T_{(0,1)} - (\beta + \eta + \mu_1 + \mu_2)T_{0,0}$$

$$\frac{dF_{0,0}}{dt} = (1 - \alpha)\omega T_{0,0} - \Phi_{0,0}^2(t) + \gamma F_{1,0} + \kappa T_{0,1} - (\beta + \eta + \mu_1 + \mu_2)F_{0,0}$$

For PWID on OST and not on NSP

$$\frac{dS_{1,0}}{dt} = -\lambda_{1,0}S_{1,0} + \beta S_{0,0} + \kappa S_{1,1} - (\gamma + \eta + \mu_1 + \mu_2)S_{1,0}$$

$$\frac{dE_{1,0}}{dt} = \delta\lambda_{1,0}S_{1,0} + (1 - \delta)\lambda_{1,0}E_{1,0} + \alpha\omega T_{1,0} + \beta E_{0,0} + \kappa E_{1,1} - (\gamma + \eta + \mu_1 + \mu_2)E_{1,0}$$

$$\frac{dI_{1,0}}{dt} = (1 - \delta)\lambda_{1,0}(S_{1,0} + E_{1,0}) - \Phi_{(1,0)}^1(t) + \beta I_{0,0} + \kappa I_{1,1} - (\gamma + \eta + \mu_1 + \mu_2)I_{1,0}$$

$$\frac{dT_{1,0}}{dt} = \Phi_{1,0}^1(t) + \Phi_{1,0}^2(t) - \omega T_{1,0} + \beta T_{0,0} + \kappa T_{1,1} - (\gamma + \eta + \mu_1 + \mu_2)T_{1,0}$$

$$\frac{dF_{1,0}}{dt} = (1 - \alpha)\omega T_{1,0} - \Phi_{1,0}^2(t) + \beta F_{0,0} + \kappa F_{1,1} - (\gamma + \eta + \mu_1 + \mu_2)F_{1,0}$$

For PWID not on OST and on NSP

$$\frac{dS_{0,1}}{dt} = -\lambda_{0,1}S_{0,1} + \eta S_{0,0} + \gamma S_{1,1} - (\kappa + \beta + \mu_1 + \mu_2)S_{0,1}$$

$$\frac{dE_{0,1}}{dt} = \delta\lambda_{0,1}S_{0,1} + (1 - \delta)\lambda_{0,1}E_{0,1} + \alpha\omega T_{0,1} + \eta E_{0,1} + \gamma E_{1,1} - (\kappa + \beta + \mu_1 + \mu_2)E_{0,1}$$

$$\frac{dI_{0,1}}{dt} = (1 - \delta)\lambda_{0,1}(S_{0,1} + E_{0,1}) - \Phi_{0,1}^1(t) + \eta I_{0,1} + \gamma I_{1,1} - (\kappa + \beta + \mu_1 + \mu_2)I_{0,1}$$

$$\frac{dT_{0,1}}{dt} = \Phi_{0,1}^1(t) + \Phi_{0,1}^2(t) - \omega T_{0,1} + \eta T_{0,1} + \gamma T_{1,1} - (\kappa + \beta + \mu_1 + \mu_2)T_{0,1}$$

$$\frac{dF_{0,1}}{dt} = (1 - \alpha)\omega T_{0,1} - \Phi_{0,1}^2(t) + \eta F_{0,1} + \gamma F_{1,1} - (\kappa + \beta + \mu_1 + \mu_2)F_{0,1}$$

For PWID on both OST and NSP

$$\frac{dS_{1,1}}{dt} = -\lambda_{1,1}S_{1,1} + \eta S_{1,0} + \beta S_{(0,1)} - (\kappa + \gamma + \mu_1 + \mu_2)S_{1,1}$$

$$\frac{dE_{1,1}}{dt} = \delta\lambda_{1,1}S_{1,1} + (1 - \delta)\lambda_{1,1}E_{1,1} + \alpha\omega T_{1,1} + \eta E_{1,0} + \beta E_{0,1} - (\kappa + \gamma + \mu_1 + \mu_2)E_{1,1}$$

$$\frac{dI_{1,1}}{dt} = (1 - \delta)\lambda_{1,1}(S_{1,1} + E_{1,1}) - \Phi_{1,1}^1(t) + \eta I_{1,0} + \beta I_{0,1} - (\kappa + \gamma + \mu_1 + \mu_2)I_{1,1}$$

$$\frac{dT_{1,1}}{dt} = \Phi_{1,1}^1(t) + \Phi_{1,1}^2(t) - \omega T_{1,1} + \eta T_{1,0} + \beta T_{0,1} - (\kappa + \gamma + \mu_1 + \mu_2)T_{1,1}$$

$$\frac{dF_{1,1}}{dt} = (1 - \alpha)\omega F_{1,1} - \Phi_{1,1}^2(t) - \eta T_{1,0} + \beta_{T(0,1)} - (\kappa + \gamma + \mu_1 + \mu_2)F_{1,1}$$

where the force of infection is given by

$$\lambda_{0,0} = \pi \frac{\Omega_{0,0} + \Gamma\Omega_{1,0} + \Pi\Omega_{0,1} + B\Omega_{1,1}}{\Omega_{0,0} + \Lambda_{0,0} + \Gamma(\Omega_{1,0} + \Lambda_{1,0}) + \Pi(\Omega_{0,1} + \Lambda_{0,1}) + B(\Omega_{1,1} + \Lambda_{1,1})}$$

$$\lambda_{1,0} = \Gamma\lambda_{0,0}$$

$$\lambda_{0,1} = \Pi\lambda_{0,0}$$

$$\lambda_{1,1} = B\lambda_{0,0}$$

where

$$\Omega_{i,j} = I_{i,j} + (1 - \alpha)T_{i,j} + F_{i,j}$$

and

$$\Lambda_{i,j} = S_{i,j} + E_{i,j} + \alpha T_{i,j}.$$

Treatments are allocated proportionally to the population size, such that if the annual number treated is  $\phi$  then all chronically infected PWID are eligible for treatment.

For sites where **only those on OST are treated** (Amsterdam, Belgium, Denmark, Finland, France, Hamburg, Scotland, Slovenia) at baseline the treatment rates are given by

$$\Phi_{1,j}^1(t) = \begin{cases} 0 & \text{if } t < tStart \\ \phi \frac{I_{1,j}}{I_{1,0} + I_{1,1}} & \text{if } \phi \frac{I_{1,j}}{I_{1,0} + I_{1,1}} < I_{1,j} \text{ and } t \geq tStart \\ I_{1,j} & \text{if } \phi \frac{I_{1,j}}{I_{1,0} + I_{1,1}} \geq I_{1,j} \text{ and } t \geq tStart \end{cases}$$

and

$$\Phi_{1,j}^2(t) = 0 \forall t$$

When switching to direct acting antivirals for sites where only those on OST are treated the treatment rates are given by

$$\Phi_{1,j}^1(t) = \begin{cases} 0 & \text{if } t < t_1 \\ \phi \frac{I_{1,j}}{I_{1,0} + I_{1,1}} & \text{if } \phi \frac{I_{1,j}}{I_{1,0} + I_{1,1}} < I_{1,j} \text{ and } t_1 \leq t < 2016 \\ I_{1,j} & \text{if } \phi \frac{I_{1,j}}{I_{1,0} + I_{1,1}} \geq I_{1,j} \text{ and } t_1 \leq t < 2016 \\ \phi \frac{I_{1,j}}{I_{1,0} + I_{1,1} + F_{1,0} + F_{1,1}} & \text{if } \phi \frac{I_{1,j}}{I_{1,0} + I_{1,1} + F_{1,0} + F_{1,1}} < I_{1,j} \text{ and } t \geq 2016 \\ I_{1,j} & \text{if } \phi \frac{I_{1,j}}{I_{1,0} + I_{1,1} + F_{1,0} + F_{1,1}} \geq I_{1,j} \text{ and } t \geq 2016 \end{cases}$$

and

$$\Phi_{1,j}^2(t) = \begin{cases} 0 & \text{if } t < 2016 \\ \phi \frac{F_{1,j}}{I_{1,0} + I_{1,1} + F_{1,0} + F_{1,1}} & \text{if } \phi \frac{F_{1,j}}{I_{1,0} + I_{1,1} + F_{1,0} + F_{1,1}} < F_{1,j} \text{ and } t \geq 2016 \\ F_{1,j} & \text{if } \phi \frac{F_{1,j}}{I_{1,0} + I_{1,1} + F_{1,0} + F_{1,1}} \geq F_{1,j} \text{ and } t \geq 2016 \end{cases}$$

All other treatment rates ( $\Phi_{0,j}^1(t)$  and  $\Phi_{0,j}^2(t)$ ) are equal to zero.

In Norway, where a proportion of treatments are amongst those on OST and a proportion are amongst those not on OST when switching to direct acting antivirals the treatment rates are given by



$$\Phi_{i,j}^1(t) = \begin{cases} 0 & \text{if } t < t_1 \\ r\phi \frac{I_{i,j}}{I_{0,0} + I_{1,0} + I_{0,1} + I_{1,1}} & \text{if } r\phi \frac{I_{i,j}}{I_{0,0} + I_{1,0} + I_{0,1} + I_{1,1}} < I_{i,j} \text{ and } t_1 \leq t < 2016 \\ I_{i,j} & \text{if } r\phi \frac{I_{i,j}}{I_{0,0} + I_{1,0} + I_{0,1} + I_{1,1}} \geq I_{i,j} \text{ and } t_1 \leq t < 2016 \\ r\phi \frac{I_{i,j}}{I_{0,0} + I_{1,0} + I_{0,1} + I_{1,1} + F_{0,0} + F_{1,0} + F_{1,1} + F_{1,1}} & \text{if } r\phi \frac{I_{i,j}}{I_{0,0} + I_{1,0} + I_{0,1} + I_{1,1} + F_{0,0} + F_{1,0} + F_{1,1} + F_{1,1}} < I_{i,j} \text{ and } t \geq 2016 \\ I_{i,j} & \text{if } r\phi \frac{I_{i,j}}{I_{0,0} + I_{1,0} + I_{0,1} + I_{1,1} + F_{0,0} + F_{1,0} + F_{1,1} + F_{1,1}} \geq I_{i,j} \text{ and } t \geq 2016 \end{cases}$$

and

$$\Phi_{i,j}^2(t) = \begin{cases} 0 & \text{if } t < 2016 \\ r\phi \frac{F_{i,j}}{I_{0,0} + I_{1,0} + I_{0,1} + I_{1,1} + F_{0,0} + F_{1,0} + F_{1,1} + F_{1,1}} & \text{if } r\phi \frac{F_{i,j}}{I_{0,0} + I_{1,0} + I_{0,1} + I_{1,1} + F_{0,0} + F_{1,0} + F_{1,1} + F_{1,1}} < F_{i,j} \text{ and } t \geq 2016 \\ F_{i,j} & \text{if } r\phi \frac{F_{i,j}}{I_{0,0} + I_{1,0} + I_{0,1} + I_{1,1} + F_{0,0} + F_{1,0} + F_{1,1} + F_{1,1}} \geq F_{i,j} \text{ and } t \geq 2016 \end{cases}$$

where  $r = r_1$  is the proportion treated who are on OST when  $i = 1$  and  $r = (1 - r_1)$  when  $i = 0$ .

We include **both opioid and methamphetamine injecting** for Czech Republic, Finland and Sweden, and therefore the model equations differ slightly for these two sites. In this case as well as the equations given above for those injecting opioids there are a further 10 equations given by

For PWID injecting methamphetamine not on NSP

$$\frac{dS_{0,0}^M}{dt} = \theta_2 - \lambda_{0,0}^M S_{0,0}^M + \kappa S_{0,1}^M - (\eta + \mu_1 + \mu_3) S_{0,0}^M$$

$$\frac{dE_{0,0}^M}{dt} = \delta \lambda_{0,0}^M S_{0,0}^M - (1 - \delta) \lambda_{0,0}^M E_{0,0}^M + \alpha \omega T_{0,0}^M + \kappa E_{0,1}^M - (\eta + \mu_1 + \mu_3) E_{0,0}^M$$

$$\frac{dI_{0,0}^M}{dt} = (1 - \delta) \lambda_{0,0}^M (S_{0,0}^M + E_{0,0}^M) - \Phi_{0,0}^{1M}(t) + \kappa I_{0,1} - (\eta + \mu_1 + \mu_3) I_{0,0}^M$$

$$\frac{dT_{0,0}^M}{dt} = \Phi_{0,0}^{1M}(t) + \Phi_{0,0}^{2M}(t) - \omega T_{0,0}^M + \kappa T_{(0,1)}^M - (\eta + \mu_1 + \mu_3) T_{0,0}^M$$

$$\frac{dF_{0,0}^M}{dt} = (1 - \alpha) \omega T_{0,0}^M - \Phi_{0,0}^{2M}(t) + \kappa T_{0,1} - (\eta + \mu_1 + \mu_3) F_{0,0}^M$$

For PWID injecting methamphetamine and on NSP

$$\frac{dS_{0,1}^M}{dt} = -\lambda_{0,1}^M S_{0,1}^M + \eta S_{0,0} - (\kappa + \mu_1 + \mu_3) S_{0,1}^M$$

$$\frac{dE_{0,1}^M}{dt} = \delta\lambda_{0,1}^M S_{0,1}^M + (1 - \delta)\lambda_{0,1}^M E_{0,1}^M + \alpha\omega T_{0,1}^M + \eta E_{0,1}^M - (\kappa + \mu_1 + \mu_3)E_{0,1}^M$$

$$\frac{dI_{0,1}^M}{dt} = (1 - \delta)\lambda_{0,1}^M (S_{0,1}^M + E_{0,1}^M) - \Phi_{0,1}^{1M}(t) + \eta I_{0,1}^M - (\kappa + \mu_1 + \mu_3)I_{0,1}^M$$

$$\frac{dT_{0,1}^M}{dt} = \Phi_{0,1}^{1M}(t) + \Phi_{0,1}^{2M}(t) - \omega T_{0,1}^M + \eta T_{0,1}^M - (\kappa + \mu_1 + \mu_3)T_{0,1}^M$$

$$\frac{dF_{0,1}^M}{dt} = (1 - \alpha)\omega T_{0,1}^M - \Phi_{0,1}^{2M}(t) + \eta F_{0,1}^M - (\kappa + \mu_1 + \mu_3)F_{0,1}^M$$

We assume random mixing between opioid and methamphetamine injectors. Therefore, the force of infection is given by

$$\lambda_{0,0} = \frac{\Omega_{0,0} + \Omega_{0,0}^M + \Gamma\Omega_{1,0} + \Pi(\Omega_{0,1} + \Omega_{0,1}^M) + B\Omega_{1,1}}{\Omega_{0,0} + \Lambda_{0,0} + \Omega_{0,0}^M + \Lambda_{0,0}^M + \Gamma(\Omega_{1,0} + \Lambda_{1,0}) + \Pi(\Omega_{0,1} + \Lambda_{0,1} + \Omega_{0,1}^M + \Lambda_{0,1}^M) + B(\Omega_{1,1} + \Lambda_{1,1})}$$

$$\lambda_{1,0} = \Gamma\lambda_{0,0}$$

$$\lambda_{0,1} = \Pi\lambda_{0,0}$$

$$\lambda_{1,1} = B\lambda_{0,0}$$

where  $\Omega_{i,j} = I_{i,j} + (1 - \alpha)T_{i,j} + F_{i,j}$  and  $\Lambda_{i,j} = S_{i,j} + E_{i,j} + \alpha T_{i,j}$ ,  $\Omega_{i,j}^M = I_{i,j}^M + (1 - \alpha)T_{i,j}^M + F_{i,j}^M$  and  $\Lambda_{i,j}^M = S_{i,j}^M + E_{i,j}^M + \alpha T_{i,j}^M$ .

In Czech Republic and Sweden it is assumed all chronically infected PWID can be treated. Therefore, when switching to DAAs, a similar expression for treatment is used as for Norway, however the proportion  $r$  is removed and the infected and failed treatment compartments are included in the numerator and denominator as appropriate.

## **2. Model calibration**

The model was parameterised to each of the 11 sites based on previously published research (Tables 1-12). Site-specific data for duration of injecting, mortality rate, proportion genotype 1, SVR rates for the different genotypes and new DAAs, and treatment numbers were used to parameterise the model.

For each site, 2500 model parameter sets were randomly sampled from the parameter uncertainty distributions (Tables S1a-S11). The rate of initiating injecting was fitted (using the built in Matlab function `lsqnonlin`) to fit to a PWID population size of 1000 which was used for all sites. The recruitment rates onto OST and NSP were also fit using `lsqnonlin` to achieve the required sampled coverages at each site. Finally, the transmission rate was fit such that the fitted chronic or antibody prevalence required at the specific year for each site was achieved.

For Czech Republic, Finland and Sweden a similar process was taken, with 2,500 parameter sets randomly sampled from the parameter uncertainty distributions alongside HCV prevalence estimates. However, for each parameter set the model was then fit to the PWID population

size in each sub-group (opioid and meth/amphetamine injectors) by varying two recruitment rates, to OST coverage by varying recruitment onto OST amongst opioid injectors, to NSP coverage by varying the recruitment rates of both sub-groups onto NSP and to either chronic or antibody HCV prevalence at a site-specific time-point by varying the transmission rate, which is the same for both sub-groups.

For Amsterdam, 3,500 parameter sets were randomly sampled, and two recruitment rates were fitted to fit to the decreasing PWID population size between 2009 and 2014, after which the PWID population is assumed stable. We fit to both chronic prevalence and incidence and assumed a decrease in transmission rate between 2009 and 2015. From these 3,500 parameter sets, runs were excluded if the second recruitment rate was un-realistically small, leaving a sample of 2,492 on which all analyses have been performed.

Detailed information on the parameters for each site are given in Supplementary Tables S1a-S1k. Any ranges that are given were sampled in each of the parameter runs, and the distribution sampled from given in the tables. For normal distributions, if the sample size was known this was used to estimate the 95% confidence interval. However, if we had a range we assumed this was the 95% confidence interval and sampled from a normal distribution within this range. The model was run using MATLAB 2016a, using timesteps of 0.05 year.

**Supplementary Tables S1a:S1k: Detailed information regarding parameter ranges for each of the 11 sites. Table S1l gives parameter ranges which were constant among sites.**

**Supplementary Table S1a: Amsterdam**

| Parameter                            | Value                                                | Distribution | Reference                                                   | Notes                                                                                                    |
|--------------------------------------|------------------------------------------------------|--------------|-------------------------------------------------------------|----------------------------------------------------------------------------------------------------------|
| <b>Duration of injecting</b>         | Median 16<br>IQR 6-24 <sup>a</sup>                   | Uniform      | Data from the Amsterdam Cohort Studies (data not published) |                                                                                                          |
| <b>Mortality rate</b>                | 23.7/1000                                            | Poisson      | (9)                                                         | 2006-2012                                                                                                |
| <b>Proportion genotype 1</b>         | 69.2% (47.1 – 86.8)                                  | Normal       | (10)                                                        | Sample size: 23.<br>HCV Genotype Distribution Among Seropositive Young Drug Users in Amsterdam Over Time |
| <b>SVR genotype 1</b>                | 37.5% (26.3 – 48.8%)                                 | Normal       | (11)                                                        | Small sample size (16) so +/- 30%                                                                        |
| <b>SVR genotype 2/3</b>              | 76% (68.4 – 83.6%)                                   | Normal       | (11)                                                        | Sample size: 41                                                                                          |
| <b>PWID population size</b>          | 2621 (1946-3374) in 2009<br>1874 (1341-2455) in 2014 | Normal       | (12)                                                        | Model a decreasing population size.                                                                      |
| <b>Antibody prevalence</b>           | 51% (44.1-57.0%)                                     | Normal       | Data from the Amsterdam Cohort Study (data not published)   | Sample size: 218                                                                                         |
| <b>Year prevalence calibrated to</b> | 2014                                                 |              |                                                             |                                                                                                          |
| <b>Treatment starts</b>              | 2005                                                 |              | (13)                                                        | Based on data from PWID from Amsterdam                                                                   |
| <b>Number treated per year</b>       | 15                                                   |              | (13)                                                        | Based on data from PWID from Amsterdam                                                                   |
| <b>OST coverage</b>                  | 75% (52.5 – 97.5%)                                   | Normal       | (14)                                                        | +/- 30%.                                                                                                 |

|                        |              |        |  |                                                                                                                                                                                                    |
|------------------------|--------------|--------|--|----------------------------------------------------------------------------------------------------------------------------------------------------------------------------------------------------|
|                        |              |        |  | “Of the opioid drug-using population, roughly 75% regularly use methadone, as opposed to approximately 40% ten years ago [13,14]. Some use methadone on a regular basis, others only occasionally” |
| <b>NSP coverage</b>    | 50% (35-65%) | Normal |  |                                                                                                                                                                                                    |
| <b>Duration on OST</b> | 1yr          |        |  |                                                                                                                                                                                                    |

<sup>a</sup> Treatment interruption not taken into account

### **Supplementary Table S1b: Belgium**

| <b>Parameter</b>                     | <b>Value</b>            | <b>Distribution</b> | <b>Reference</b> | <b>Notes</b>                                      |
|--------------------------------------|-------------------------|---------------------|------------------|---------------------------------------------------|
| <b>Duration of injecting</b>         | 12.4yrs (6.2 – 18.6yrs) | Uniform             | (15)             | +/-50%                                            |
| <b>Mortality rate</b>                | 25 per 1000             | Poisson             | (16, 17)         |                                                   |
| <b>Proportion genotype 1</b>         | 43.7% (31.9 – 56.0%)    | Normal              | (16)             | Sample size: 71                                   |
| <b>SVR genotype 1</b>                | 65.2% (42.7 – 83.6%)    | Normal              | (16)             | Sample size: 23                                   |
| <b>SVR genotype 2/3</b>              | 92% (74 – 92%)          | Normal              | (16)             | Sample size: 25<br>Have taken upper bound as 92%. |
| <b>PWID population size</b>          | 9080 (6356 – 11804)     | Normal              | (17)             | +/-30%                                            |
| <b>Antibody prevalence</b>           | 43.3% (34.3 – 52.4%)    | Normal              | (18)             |                                                   |
| <b>Year prevalence calibrated to</b> | 2012                    |                     | (18)             |                                                   |
| <b>Treatment starts</b>              | 2004                    |                     |                  |                                                   |
| <b>Number treated per year</b>       | 30 per year             |                     | (16)             |                                                   |
| <b>OST coverage</b>                  | 35.6% (27.4 – 50.8%)    | Log-normal          | (17)             | 3230 on OST. Then use PWID population estimates.  |

|                        |                      |            |      |                                                     |
|------------------------|----------------------|------------|------|-----------------------------------------------------|
| <b>NSP coverage</b>    | 29.6% (22.8 – 42.3%) | Log-normal | (17) | 2690 using NSP. Then use PWID population estimates. |
| <b>Duration on OST</b> | 3.7 yrs              |            | (16) |                                                     |

**Supplementary Table S1c: Czech Republic**

| <b>Parameter</b>                     | <b>Value</b>                                                             | <b>Distribution</b> | <b>Reference</b> | <b>Notes</b>                                                   |
|--------------------------------------|--------------------------------------------------------------------------|---------------------|------------------|----------------------------------------------------------------|
| <b>Duration of injecting</b>         | Opioid:<br>12yrs (6 – 18yrs)<br>Methamphetamine:<br>9yrs (4.5 – 13.5yrs) | Uniform             | (19)             | +/-50%                                                         |
| <b>Mortality rate</b>                | 7.5 per 1000                                                             | Poisson             | (20-22)          | Give 0.7-0.8. As use Poisson distribution have used mid point. |
| <b>Proportion genotype 1</b>         | 75.5% (69.5 – 81.2%)                                                     | Normal              | (23)             | Sample size: 222<br>Note this is for Prague.                   |
| <b>SVR genotype 1</b>                | 53.8% (45.3 – 62.2%)                                                     | Normal              | (24)             | Sample size: 143<br>Note this is for Brno                      |
| <b>SVR genotype 2/3</b>              | 82.1% (63.1 – 93.9%)                                                     | Normal              | (24)             | Sample size: 28<br>Note this is for Brno                       |
| <b>PWID population size</b>          | 41816 – 46563                                                            | Normal              | (25)             |                                                                |
| <b>Antibody prevalence</b>           | 35% (31.6 – 38.5%)                                                       | Normal              | (26, 27)         | National HCV study in low threshold facilities                 |
| <b>Year prevalence calibrated to</b> | 2004                                                                     |                     | (26)             | Study 2003-2005                                                |
| <b>Treatment starts</b>              | 2002                                                                     |                     | (28)             |                                                                |
| <b>Number treated per year</b>       | 2002-2011: 370 per year<br>2011-2015: 540 per year                       |                     | (27-29)          |                                                                |



|                                                  |                  |        |      |                                                                                                                       |
|--------------------------------------------------|------------------|--------|------|-----------------------------------------------------------------------------------------------------------------------|
| <b>OST coverage</b>                              | 32% (22 – 41.6%) | Normal | (27) | Estimated 3000-4000 users in OST of 10700 estimated opioid problem users. Taken as 3500 gives 32%. Then have +/- 30%. |
| <b>NSP coverage</b>                              | 70% (49 – 91%)   | Normal | (27) |                                                                                                                       |
| <b>Duration on OST</b>                           | 0.93 yr          |        | (30) | Calculated from substitution register in Czech Republic.                                                              |
| <b>Ratio of opioid:methamphetamine injectors</b> | 1:3              |        | (25) |                                                                                                                       |

**Supplementary Table S1d: Denmark**

| Parameter                    | Value                                | Distribution | Reference                      | Notes                                                                                                                                                             |
|------------------------------|--------------------------------------|--------------|--------------------------------|-------------------------------------------------------------------------------------------------------------------------------------------------------------------|
| <b>Duration of injecting</b> | 12 year (IQR 7 – 19yrs) <sup>a</sup> | Uniform      | (31)                           | From a survey investigating prevalence of chronic hepatitis and HIV unfection among drug users attending treatment centres.<br>Median time since first injection. |
| <b>Mortality rate</b>        | 20/1000 per year                     | Poisson      | (32, 33)                       |                                                                                                                                                                   |
| <b>Proportion genotype 1</b> | 45.9% (40.9 – 51.0%)                 | Normal       | H. Krarup perss comm with Anne | Sample size: 6000<br>National numbers of all infected                                                                                                             |
| <b>SVR genotype 1</b>        | 44.4% (35.8-53.2)                    | Normal       | (34)                           | No genotypic SVR rates available for IDUs.                                                                                                                        |
| <b>SVR genotype 2/3</b>      | 71.9% (66.3-77.1)                    | Normal       | (34)                           |                                                                                                                                                                   |

|                             |                       |        |         |                                                                                                                                                                                                                                                                                                                                                                                                                                                                                                                                                                                                                                                                                                                                                                                                                                                       |
|-----------------------------|-----------------------|--------|---------|-------------------------------------------------------------------------------------------------------------------------------------------------------------------------------------------------------------------------------------------------------------------------------------------------------------------------------------------------------------------------------------------------------------------------------------------------------------------------------------------------------------------------------------------------------------------------------------------------------------------------------------------------------------------------------------------------------------------------------------------------------------------------------------------------------------------------------------------------------|
|                             |                       |        |         | G1: 59/133<br>G2/3: 205/285                                                                                                                                                                                                                                                                                                                                                                                                                                                                                                                                                                                                                                                                                                                                                                                                                           |
| <b>PWID population size</b> | 16500 (13000 – 19000) | Normal | (35-37) | <p>The Danish Health Board estimates 13.000 (10.066-16.821) people are active injectors based on a cross reference between the National Patient Register and the National Drug Treatment Register(SIB). (P. Christensen 2009)</p> <p>7850 patients are registered in SIB (2012) to be on OST. A proportion are still injecting</p> <p>By cross referencing the different databases where a diagnosis of Chronic hepatitis C can be found with information from SIB about the proportion of PWIDS tested and the proportion positive it is estimated that there is approx. 9.500 drugs users ( all kinds) with CHC (diagnosed and undiagnosed). From the same and other studies it is estimated that 40- 53% of all PWIDS have CHC( anti HCV 67-85% - 62,2 % develops CHC). This would correspond to a total “PWID number” of 19.000.(35, 36, 38).</p> |

|                                      |                                                                |            |                                                                      |                                                                                                                                                                         |
|--------------------------------------|----------------------------------------------------------------|------------|----------------------------------------------------------------------|-------------------------------------------------------------------------------------------------------------------------------------------------------------------------|
| <b>Chronic prevalence</b>            | 35 – 45%                                                       | Normal     | Mössner et al J Med Virology 2010<br>Øvrehus et al Poster Inshu 2015 | Mössner et al J Med Virology 2010 1635-39 (40%)<br>2009 data – sample<br>Øvrehus et al Poster Inshu 2015<br>2015 sample n= 411 35%                                      |
| <b>Year prevalence calibrated to</b> | 2014                                                           |            | Personal communication with Anne Øvrehus                             |                                                                                                                                                                         |
| <b>Treatment starts</b>              | 2002                                                           |            |                                                                      |                                                                                                                                                                         |
| <b>Number treated per year</b>       | 2002-2014: 53 per yr<br>2014-2015: 50 per yr<br>2015-2016: 100 |            | (34). Personal communication with Anne Øvrehus                       | 432 registered treatments in the national treatment database DANHEP 2002-2007. 219 infected by IDU, Aprox under reporting 20%<br>(219*1.2)/5 = 53<br>Treated if on OST. |
| <b>OST coverage</b>                  | 41.1 – 60%                                                     | Log-normal | National drug treatment register                                     | Currently 7800 on OST. The calculated based on PWID pop size.                                                                                                           |
| <b>NSP coverage</b>                  | 50% (35-65%)                                                   | Normal     |                                                                      | +/- 30%<br>No data for Denmark                                                                                                                                          |
| <b>Duration on OST</b>               | 1 yr                                                           |            |                                                                      |                                                                                                                                                                         |

<sup>a</sup> Note this is median time since first injection, not necessarily duration of injection.

### **Supplementary Table S1e: Finland**

| Parameter                    | Value                | Distribution | Reference                                         | Notes                       |
|------------------------------|----------------------|--------------|---------------------------------------------------|-----------------------------|
| <b>Duration of injecting</b> | 14yrs (7 – 21yrs)    | Uniform      | Unpublished – 2014 exit poll bio-behaviour study. | +/- 50%<br>Sample size 600. |
| <b>Mortality rate</b>        | 2%                   | Poisson      | (39)                                              | Western Europe              |
| <b>Proportion genotype 1</b> | 25.1% (24.0 – 26.2%) | Normal       | (40)                                              |                             |
| <b>SVR genotype 1</b>        | 50-60%               | Normal       | (40)                                              |                             |

|                                      |                       |            |                                                                                                                                                              |                  |
|--------------------------------------|-----------------------|------------|--------------------------------------------------------------------------------------------------------------------------------------------------------------|------------------|
| <b>SVR genotype 2/3</b>              | 70-80%                | Normal     | (40)                                                                                                                                                         |                  |
| <b>PWID population size</b>          | 15611 (13770 – 22655) | Normal     | (41)                                                                                                                                                         |                  |
| <b>Antibody prevalence</b>           | 76% (72.4-79.4%)      | Normal     | Unpublished – 2014 exit poll bio-behaviour study.                                                                                                            | Sample size 600. |
| <b>Year prevalence calibrated to</b> | 2014                  |            |                                                                                                                                                              |                  |
| <b>Treatment starts</b>              | 2006                  |            |                                                                                                                                                              |                  |
| <b>Number treated per year</b>       | 5                     |            | Number treated per year 5 (active injecting drug users). This is an average estimate for the past 10 years. Communication with Henrikki Brummer-Korvenkontio |                  |
| <b>OST coverage</b>                  | 24.4-28.1%            | Normal     | Best expert opinion. (42)                                                                                                                                    |                  |
| <b>NSP coverage</b>                  | 68% (47.2 - 77.6%)    | Log-normal | Annual data collection from Low Threshold Service Centres (Needle Exchange) by National Institute for Health and Welfare (THL).                              |                  |
| <b>Duration on OST</b>               | 5 yrs                 |            | (43)                                                                                                                                                         |                  |

### **Supplementary Table S1f: France**

| <b>Parameter</b>             | <b>Value</b>          | <b>Distribution</b> | <b>Reference</b>      | <b>Notes</b> |
|------------------------------|-----------------------|---------------------|-----------------------|--------------|
| <b>Duration of injecting</b> | 14yrs (7 – 21yrs)     | Uniform             | ANRS-coquelicot       |              |
| <b>Mortality rate</b>        | 1.26%                 | Poisson             | Mortality cohort OFDT |              |
| <b>Proportion genotype 1</b> | 46% (32.3 – 59.8%)    | Normal              | ANRS-Hepaviih         | +/- 30%      |
| <b>SVR genotype 1</b>        | 70-75%                | Normal              | ANRS-Hepaviih         | +/- 10%      |
| <b>SVR genotype 2/3</b>      | 80%                   | Normal              | ANRS-Hepaviih         |              |
| <b>PWID population size</b>  | 80000 (65000 – 95000) | Normal              | (44) OFDT             |              |

|                                      |                         |        |                                                                                                                                                                                                    |                                                                                                                                                                                                                                    |
|--------------------------------------|-------------------------|--------|----------------------------------------------------------------------------------------------------------------------------------------------------------------------------------------------------|------------------------------------------------------------------------------------------------------------------------------------------------------------------------------------------------------------------------------------|
| <b>Antibody prevalence</b>           | 66.37% (60.32 – 71.92%) | Normal | (45) ANRS-coquelicot                                                                                                                                                                               | Sample size: 418                                                                                                                                                                                                                   |
| <b>Year prevalence calibrated to</b> | 2011                    |        | ANRS-coquelicot                                                                                                                                                                                    |                                                                                                                                                                                                                                    |
| <b>Treatment starts</b>              | 2001                    |        |                                                                                                                                                                                                    |                                                                                                                                                                                                                                    |
| <b>Number treated per year</b>       |                         |        | (45) ANRS-coquelicot<br><br>Treatment amongst those on OST.<br>Note: these are the calculated number treated<br>Treatment number is treatment rate given on 52% of PWID who are antibody positive. | Sample size: 291<br>Treatment number calculated based on finding the proportion PWID who are antibody positive that have not been cured and then using the treatment rate (6.2% (3.0-12.3%)) to find the number treated each year. |
| <b>OST coverage</b>                  | 80%                     | Normal |                                                                                                                                                                                                    | +/- 10%                                                                                                                                                                                                                            |
| <b>NSP coverage</b>                  | 40 – 60%                | Normal |                                                                                                                                                                                                    |                                                                                                                                                                                                                                    |
| <b>Duration on OST</b>               | 1 yr.                   |        |                                                                                                                                                                                                    |                                                                                                                                                                                                                                    |

**Supplementary Table S1g: Hamburg**

| Parameter                    | Value                   | Distribution | Reference                                   | Notes                                                               |
|------------------------------|-------------------------|--------------|---------------------------------------------|---------------------------------------------------------------------|
| <b>Duration of injecting</b> | 18 yrs<br>IQR: 12-24yrs | Uniform      | (46)                                        |                                                                     |
| <b>Mortality rate</b>        | 0.73 per yr             | Poisson      | (47)                                        |                                                                     |
| <b>Proportion genotype 1</b> | 52.1% (46.4 – 57.6%)    | Normal       | (46)<br>Details of survey methodology: (48) | Sample size: 319                                                    |
| <b>SVR genotype 1</b>        | 48% (34.7 – 62.0%)      | Normal       | (49)                                        | Confidence bounds for both calculated using stata.<br>N=56 for G1/4 |
| <b>SVR genotype 2/3</b>      | 81% (66.9 – 90.2%)      | Normal       | (49)                                        |                                                                     |

|                                      |                                              |        |                                                                                                                                                                                                                                                                                                                                                                   |                  |
|--------------------------------------|----------------------------------------------|--------|-------------------------------------------------------------------------------------------------------------------------------------------------------------------------------------------------------------------------------------------------------------------------------------------------------------------------------------------------------------------|------------------|
|                                      |                                              |        |                                                                                                                                                                                                                                                                                                                                                                   | N=51 for G2/3    |
| <b>PWID population size</b>          | 8492 (7582 – 9436)                           | Normal | (50)<br>Estimates on the basis of OST registration data: On July 1, 2013: 4.246 patients registered for OST in Hamburg. OST coverage estimates among problem opiate user ranges between 45%-56% (Kraus et al. 2004; RKI 2014)                                                                                                                                     |                  |
| <b>Antibody prevalence</b>           | 67.7% (62.3 -72.8)                           | Normal | (46)                                                                                                                                                                                                                                                                                                                                                              | Sample size: 319 |
| <b>Year prevalence calibrated to</b> | 2014                                         |        | (49)                                                                                                                                                                                                                                                                                                                                                              |                  |
| <b>Treatment starts</b>              | 2005                                         |        | Communication with Bernd Schulte                                                                                                                                                                                                                                                                                                                                  |                  |
| <b>Number treated per year</b>       | 2005-2011: 60 per yr<br>2011-2015: 72 per yr |        | “Own calculations of prescription data from the Northern Germany Computing Centre for Pharmacies. For the calculations we used the prescription data of Methadone/Buprenorphin to identify patients in OST (N=3691 for 2011) for the region of Hamburg. For those OST patients, we identified 72 co-prescriptions of PEG-IFN and/or Ribavirin for the year 2011.” |                  |
| <b>OST coverage</b>                  | 56.3% (50.8-61.9%)                           | Normal | (46)                                                                                                                                                                                                                                                                                                                                                              |                  |
| <b>NSP coverage</b>                  | 78.5% (73.4-82.8%)                           | Normal | (51, 52)<br>Reported number of PWID receiving 'needle and syringes' at low-threshold facilities in the last 30days according to a question of the Druck-study for Hamburg (Question: Reported main                                                                                                                                                                | Sample size: 319 |

|                        |              |  |                                                           |  |
|------------------------|--------------|--|-----------------------------------------------------------|--|
|                        |              |  | source/location for needle/syringe exchange)              |  |
| <b>Duration on OST</b> | 24.93 months |  | Calculated for this study. Used a dataset from 2005-2011. |  |

**Supplementary Table S1h: Norway**

| <b>Parameter</b>                     | <b>Value</b>          | <b>Distribution</b> | <b>Reference</b>                                                                     | <b>Notes</b>                                                     |
|--------------------------------------|-----------------------|---------------------|--------------------------------------------------------------------------------------|------------------------------------------------------------------|
| <b>Duration of injecting</b>         | 14yrs (7 – 21yrs)     | Uniform             | (53)                                                                                 |                                                                  |
| <b>Mortality rate</b>                | 1.9% per year         | Poisson             | (54)                                                                                 |                                                                  |
| <b>Proportion genotype 1</b>         | 40% (28% - 52%)       | Normal              | Norwegian Institute of Public Health                                                 |                                                                  |
| <b>SVR genotype 1</b>                | 45% (24.4 – 65.1%)    | Normal              | (55)                                                                                 | Sample size: 25                                                  |
| <b>SVR genotype 2/3</b>              | 70% (55.4 – 82.1%)    | Normal              | (55)                                                                                 | Sample size: 50                                                  |
| <b>PWID population size</b>          | 15500 (10850 – 20150) | Normal              | (56) and data on file based on Norwegian Prescription Registry (OST 2004-2014)       | +/- 30%                                                          |
| <b>Chronic prevalence</b>            | 45% (42.6 – 47.5%)    | Normal              | Surveillance data from Oslo and Bergen. Rikard Rykkvin, National Insitute of Health. | Sample size: 1639.<br>Prevalence 45%<br>Bounds found using stata |
| <b>Year prevalence calibrated to</b> | 2007                  |                     |                                                                                      | Data for 2002-2012 so taken half way point.                      |
| <b>Treatment starts</b>              | 2009                  |                     |                                                                                      |                                                                  |
| <b>Number treated per year</b>       | 100 per yr            |                     | (57) + personal communication with Olav Dalgard                                      |                                                                  |
| <b>OST coverage</b>                  | 40% (28% - 52%)       | Normal              | (58)                                                                                 |                                                                  |
| <b>NSP coverage</b>                  | 51% (35-73%)          | Normal              | Personal communication Ellen Amundsen, Norwegian Intitute of Public Health           |                                                                  |
| <b>Duration on OST</b>               | 1.97 yrs              |                     | (59)                                                                                 |                                                                  |

**Supplementary Table S1i: Scotland**

| Parameter                            | Value                                                                 | Distribution | Reference                            | Notes                                                        |
|--------------------------------------|-----------------------------------------------------------------------|--------------|--------------------------------------|--------------------------------------------------------------|
| <b>Duration of injecting</b>         | 11yrs (5.5 – 16.5yrs)                                                 | Uniform      | (60)                                 | +/- 50%                                                      |
| <b>Mortality rate</b>                | 1% per year                                                           | Poisson      | (61)                                 |                                                              |
| <b>Proportion genotype 1</b>         | 47.8% (46.9 – 48.6%)                                                  | Normal       | (62)                                 |                                                              |
| <b>SVR genotype 1</b>                | 39.0 (33.6 – 44.7%)                                                   | Normal       | (63)                                 |                                                              |
| <b>SVR genotype 2/3</b>              | 69.7% (65.8 – 73.4%_)                                                 | Normal       | (63)                                 |                                                              |
| <b>PWID population size</b>          | 16000 (11500 – 19400)                                                 | Normal       | (64)                                 |                                                              |
| <b>Antibody prevalence</b>           | 58% (55.8 – 60.2%)                                                    | Normal       | NESI                                 |                                                              |
| <b>Year prevalence calibrated to</b> | 2013/14                                                               |              | NESI                                 |                                                              |
| <b>Treatment starts</b>              | 2005                                                                  |              | Communication with Sharon Hutchinson |                                                              |
| <b>Number treated per year</b>       | 2005-2008: 60 per yr<br>2008-2009: 90 per yr<br>2009-2015: 150 per yr |              | Communication with Sharon Hutchinson |                                                              |
| <b>OST coverage</b>                  | 54.5% (51.4 – 57.8%)                                                  | Normal       | NESI                                 |                                                              |
| <b>NSP coverage</b>                  | 77% (75.2 – 78.8%)                                                    | Normal       | (65)                                 | Sample size: 2154.<br>77% coverage. Bounds found using stata |
| <b>Duration on OST</b>               | 2/3 <sup>rd</sup> of a year (240 days)                                |              | (66)                                 |                                                              |

**Supplementary Table S1j: Slovenia**

| Parameter | Value | Distribution | Reference | Notes |
|-----------|-------|--------------|-----------|-------|
|-----------|-------|--------------|-----------|-------|



|                                      |                                                                    |         |          |                                                          |
|--------------------------------------|--------------------------------------------------------------------|---------|----------|----------------------------------------------------------|
| <b>Duration of injecting</b>         | 15.4yrs (7.7-23.1 yrs)                                             | Uniform |          | Average taken for sites<br>+/- 50%                       |
| <b>Mortality rate</b>                | 0.26% per yr                                                       | Poisson | (67)     |                                                          |
| <b>Proportion genotype 1</b>         | 38.6% (36.1 – 41.1%)                                               | Normal  | (68)     | Sample size 1504                                         |
| <b>SVR genotype 1</b>                | 75% (55 – 89%)                                                     | Normal  | (69, 70) | Total sample size 130.<br>28% G1 – n=36<br>72% G3 – n=94 |
| <b>SVR genotype 2/3</b>              | 87.5% (79.1 – 87.5%)                                               | Normal  |          | Bound upper estimate for<br>G2/3 with mean as high.      |
| <b>PWID population size</b>          | 6000 (4200 - 7800)                                                 | Normal  | (67)     | +/- 30%                                                  |
| <b>Antibody prevalence</b>           | 27.3% (19.1 – 35.5%)                                               | Normal  | (67)     | +/- 30%                                                  |
| <b>Year prevalence calibrated to</b> | 2012                                                               |         | (67)     |                                                          |
| <b>Treatment starts</b>              | 1997                                                               |         | (69)     |                                                          |
| <b>Number treated per year</b>       | 1997-1999: 2 per yr<br>1999-2008: 5 per yr<br>2008-2015: 62 per yr |         | (69-72)  |                                                          |
| <b>OST coverage</b>                  | 43% (30 – 56%)                                                     | Normal  |          | +/- 30%<br>No data for Slovenia                          |
| <b>NSP coverage</b>                  | 50% (35-65%)                                                       | Normal  |          | +/- 30%<br>No data for Slovenia                          |
| <b>Duration on OST</b>               | 1yr                                                                |         |          |                                                          |

**Supplementary Table S1k: Sweden**

| Parameter                    | Value                   | Distribution | Reference                           | Notes  |
|------------------------------|-------------------------|--------------|-------------------------------------|--------|
| <b>Duration of injecting</b> | 17.8yrs (8.9 – 26.7yrs) | Uniform      | Stockholm Needle Exchange Programme | +/-50% |

|                                      |                                                 |         |                                                                 |                                                                                                                                                                                                                                                                          |
|--------------------------------------|-------------------------------------------------|---------|-----------------------------------------------------------------|--------------------------------------------------------------------------------------------------------------------------------------------------------------------------------------------------------------------------------------------------------------------------|
| <b>Mortality rate</b>                | 2%                                              | Poisson | (39)                                                            | Western Europe                                                                                                                                                                                                                                                           |
| <b>Proportion genotype 1</b>         | 54.3% (42.9 – 65.4%)                            | Normal  | (73)                                                            | Sample size: 81<br>Note this is for three Swedish cities.                                                                                                                                                                                                                |
| <b>SVR genotype 1</b>                | 42.9% (17.5–68.2%)                              | Normal  | (74)                                                            | Using systematic review as sample size so small                                                                                                                                                                                                                          |
| <b>SVR genotype 2/3</b>              | 73.1% (55.2–91.0%)                              | Normal  | (74)                                                            | Using systematic review as sample size so small                                                                                                                                                                                                                          |
| <b>PWID population size</b>          | 8021 - 26550                                    | Normal  | (75-77)                                                         | 8021 – estimated number of PWID in 2008-2011. Probable underestimate. Maximum is 90% of the Estimated number of “problematic drug users” (PDU), defined as people who inject drugs during the past 12 months or have used illicit drugs on a daily basis during the past |
| <b>Antibody prevalence</b>           | 81.7% (79.6 – 83.6%)                            | Normal  | Stockholm Needle Exchange Programme                             | N = 1507                                                                                                                                                                                                                                                                 |
| <b>Year prevalence calibrated to</b> | 2014                                            |         |                                                                 |                                                                                                                                                                                                                                                                          |
| <b>Treatment starts</b>              | 2014                                            |         | Communication with Martin Kaberg                                |                                                                                                                                                                                                                                                                          |
| <b>Number treated per year</b>       | 2004-2013: 45<br>2014: 0<br>2015: 70 (new DAAs) |         | (73)<br>Communication with Martin Kaberg                        |                                                                                                                                                                                                                                                                          |
| <b>OST coverage</b>                  | 14 – 46%                                        | Normal  | Ref for 3700 on OST: (78), personal communication Martin Kaberg | 3700 people on OST (2013). Percentages found based on max and min population sizes.                                                                                                                                                                                      |

|                                                  |         |        |                                  |                                                                                                                                                                                                                                                                                                                                                                                    |
|--------------------------------------------------|---------|--------|----------------------------------|------------------------------------------------------------------------------------------------------------------------------------------------------------------------------------------------------------------------------------------------------------------------------------------------------------------------------------------------------------------------------------|
| <b>NSP coverage</b>                              | 9.8-32% | Normal | Communication with Martin Kaberg | In 2014 only 2592 persons visited the Sweden NSPs<br><a href="http://www.regeringen.se/contentassets/4a81589e331641eaa4ecec35c714347f/okad-tillganglighet-till-sprututbytesverksamheter-i-sverige-ds-2015_56-webb.pdf">http://www.regeringen.se/contentassets/4a81589e331641eaa4ecec35c714347f/okad-tillganglighet-till-sprututbytesverksamheter-i-sverige-ds-2015_56-webb.pdf</a> |
| <b>Duration on OST</b>                           | 1yr     |        |                                  |                                                                                                                                                                                                                                                                                                                                                                                    |
| <b>Ratio of opioid:methamphetamine injectors</b> | 1:1     |        | Communication with Martin Kaberg | Largest NSP cohort.                                                                                                                                                                                                                                                                                                                                                                |

**Supplementary Table S11: All other parameters**

| <b>Parameter</b>                                       | <b>Value</b>     | <b>Distribution</b> | <b>Reference</b> | <b>Notes</b>                     |
|--------------------------------------------------------|------------------|---------------------|------------------|----------------------------------|
| <b>Rate of spontaneous clearance</b>                   | 0.26 (0.22-0.29) | Normal              | (79)             |                                  |
| <b>Relative risk of acquiring HCV while:</b>           |                  |                     |                  |                                  |
| <b>on OST</b>                                          | 0.42 (0.3-0.53)  | Log-normal          | (80)             |                                  |
| <b>on NSP</b>                                          | 0.43 (0.15-0.70) | Log-normal          | (80)             |                                  |
| <b>on OST and NSP</b>                                  | 0.18 (0.04-0.32) | Log-normal          | (80)             |                                  |
| <b>SVR rate new DAAs</b>                               | 0.9 (0.85-0.95)  | Normal              | (81, 82)         |                                  |
| <b>Average treatment duration (pre-DAA treatment):</b> |                  |                     |                  |                                  |
| <b>Genotypes 1 failed treatment</b>                    | 12 weeks         |                     | (83)             | Weighted average calculated from |

|                               |          |  |          |                                                                                                                                                   |
|-------------------------------|----------|--|----------|---------------------------------------------------------------------------------------------------------------------------------------------------|
| <b>Genotype 1</b>             | 48 weeks |  | (83)     | Proportion G1*Duration G1 + Proportion G2/G3*Duration G2/G3.<br><br>Duration G1 calculated from G1_svr*Duration SVR + (1-G1_svr)*Duration non SVR |
| <b>Genotypes 2/3</b>          | 24 weeks |  | (83)     |                                                                                                                                                   |
| <b>All genotypes new DAAs</b> | 12 weeks |  | (81, 82) |                                                                                                                                                   |

### **3. Results**

Table S2a and S2b shows the median and 95% credibility intervals for the 2,500 parameter sets for the chronic prevalence (S1a) and incidence per 100 person years (S2b) in 2016, chronic prevalence in 2026 if switching to DAAs, switching and doubling treatments and switching and treating 50 per 1000 PWID annually. The table also shows the relative decrease in chronic prevalence between 2016 and 2026. For each site the top row shows these metrics with current coverage of OST and NSP at each site, and the bottom row shows if OST and NSP are increased to 80% coverage (unless coverage is already higher).

Table S3 shows the differential benefit of scaling-up OST and NSP alongside treatment on reducing chronic prevalence compared to current OST and NSP levels. For each site, the tables shows the relative decrease in HCV prevalence between 2016 and 2026 if treatment is scaled-up with current levels of OST and NSP and with scaled-up OST and NSP to 80% coverage when switching to DAAs, and how much fold greater this difference is.

Table S2a: Table showing HCV chronic prevalence at baseline in 2016 and under the different scenarios in 2026 both with and without the scale-up of OST and NSP to 80% coverage if not already achieved. The relative decrease between 2016 and 2026 in chronic HCV prevalence is also given. Values are the median and 95% credibility interval

| Site           | With/without scale-up of OST/NSP | HCV chronic prevalence |                       |                                    |                                             | Relative decrease 2016 - 2026 |                              |                               |
|----------------|----------------------------------|------------------------|-----------------------|------------------------------------|---------------------------------------------|-------------------------------|------------------------------|-------------------------------|
|                |                                  | 2016                   | 2026 – switch to DAAs | 2026 – Switch and double treatment | 2026 – Switch to DAA and treat 50/1000 PWID | Switch to DAAs                | Switch and double treatments | Switch and treat 50/1000 PWID |
| Amsterdam      | Without                          | 33.0%<br>(29.0-37.4%)  | 15.8%<br>(10.6-25.2%) | 14.5%<br>(9.3-23.8%)               | 0.1%<br>(0.0-0.5%)                          | 51.8%<br>(28.7-65.7%)         | 55.8%<br>(32.8-69.6%)        | 99.7%<br>(98.4-99.9%)         |
|                | With                             | 33.0%<br>(29.0-37.4%)  | 14.4%<br>(9.7-23.0%)  | 13.1%<br>(8.5-21.6%)               | 0.1%<br>(0-0.2%)                            | 56.4%<br>(35.0-68.4%)         | 60.2%<br>(39.0-72.3%)        | 99.8%<br>(99.5-100.0%)        |
| Belgium        | Without                          | 31.6%<br>(25.6-37.5%)  | 30.2%<br>(23.9-36.3%) | 27.6%<br>(21.2-34.3%)              | 9.7%<br>(4.9-14.7%)                         | 4.4%<br>(2.2-8.0%)            | 11.6%<br>(7.2-18.9%)         | 69.3%<br>(57.5-83.3%)         |
|                | With                             | 31.6%<br>(25.6-37.5%)  | 16.2%<br>(10.0-23.7%) | 14.0%<br>(8.1-21.4%)               | 0.2%<br>(0.1-0.5%)                          | 48.4%<br>(31.2-65.7%)         | 55.6%<br>(38.6-72.3%)        | 99.5%<br>(98.7-99.9%)         |
| Czech Republic | Without                          | 20.9%<br>(18.2-23.8%)  | 13.0%<br>(9.3-16.8%)  | 1.8%<br>(0.3-6.2%)                 | <0.1%                                       | 37.8%<br>(28.2-49.8%)         | 91.6%<br>(73.5-98.2%)        | 99.9%<br>(99.7-99.9%)         |
|                | With                             | 20.9%<br>(1.2-23.8%)   | 9.2%<br>(5.0-13.7%)   | 0.6%<br>(0.1-3.2%)                 | <0.1%                                       | 55.8%<br>(39.7-74.7%)         | 97.3%<br>(86.1-99.4%)        | 99.9%<br>(99.8-100.0%)        |
| Denmark        | Without                          | 39.9%<br>(35.6-44.1%)  | 36.7%<br>(32.0-41.3%) | 32.5%<br>(27.3-37.6%)              | 6.3%<br>(3.5-10.9%)                         | 7.6%<br>(5.2-10.8%)           | 18.1%<br>(13.1-24.5%)        | 84.1%<br>(74.7-90.6%)         |
|                | With                             | 39.9%<br>(35.6-44.1%)  | 22.3%<br>(15.5-29.1%) | 18.1%<br>(11.6-24.8%)              | 0.5%<br>(0.2-1.3%)                          | 43.5%<br>(29.9-59.6%)         | 54.2%<br>(40.6-69.5%)        | 98.7%<br>(96.9-99.4%)         |
| Finland        | Without                          | 56.1%<br>(53.1-59.4%)  | 56.1%<br>(53.0-59.4%) | 56.0%<br>(52.9-59.2%)              | 24.8%<br>(18.2-31.5%)                       | 0.1%<br>(0.1-0.2%)            | 0.4%<br>(0.3-0.6%)           | 55.9%<br>(46.1-66.2%)         |
|                | With                             | 56.2%                  | 46.3%                 | 46.1%                              | 12.8%                                       | 17.6%                         | 17.9%                        | 77.3%                         |

|                 |         |                       |                       |                       |                       |                       |                       |                         |
|-----------------|---------|-----------------------|-----------------------|-----------------------|-----------------------|-----------------------|-----------------------|-------------------------|
|                 |         | (53.1-59.4%)          | (40.0-51.6%)          | (39.8-51.5%)          | (5.9-20.0%)           | (10.0-27.9%)          | (10.3-28.2%)          | (65.8-89.1%)            |
| <b>France</b>   | Without | 47.3%<br>(42.3-51.9%) | 43.9%<br>(35.6-50.2%) | 30.0%<br>(6.6-41.8%)  | 24.9%<br>(11.6-39.4%) | 6.7%<br>(2.3-18.1%)   | 36.4%<br>(16.7-85.5%) | 47.6%<br>(21.7-73.8%)   |
|                 | With    | 47.3%<br>(42.3-51.9%) | 30.5%<br>(19.2-39.9%) | 14.2%<br>(1.0-29.8%)  | 8.3%<br>(2.1-21.0%)   | 35.5%<br>(19.7-57.5%) | 69.7%<br>(39.2-97.8%) | 82.5%<br>(57.3-95.4%)   |
| <b>Hamburg</b>  | Without | 49.6%<br>(45.7-53.5%) | 45.8%<br>(41.4-50.3%) | 40.0%<br>(34.9-45.0%) | 13.9%<br>(8.2-20.8%)  | 7.5%<br>(5.3-10.1%)   | 19.3%<br>(15.2-24.3%) | 71.9%<br>(60.5-82.4%)   |
|                 | With    | 49.6%<br>(45.7-53.5%) | 39.9%<br>(34.4-45.7%) | 33.8%<br>(28.2-39.9%) | 7.4%<br>(3.1-14.5%)   | 19.5%<br>(11.7-27.6%) | 31.7%<br>(23.0-40.7%) | 81.9%<br>(72.3-93.3%)   |
| <b>Norway</b>   | Without | 42.9%<br>(40.7-45.2%) | 40.0%<br>(36.7-42.9%) | 35.8%<br>(31.0-39.5%) | 8.1%<br>(4.1-13.3%)   | 6.7%<br>(4.2-10.8%)   | 16.5%<br>(11.3-25.1%) | 81.1%<br>(70.0-90.1%)   |
|                 | With    | 42.9%<br>(40.7-45.2%) | 24.3<br>(17.1-30.8%)  | 19.8%<br>(12.7-26.6%) | 0.5%<br>(0.2-1.3%)    | 43.3%<br>(28.8-59.4%) | 53.6%<br>(38.4-70.1%) | 98.9%<br>(97.0-99.6%)   |
| <b>Scotland</b> | Without | 42.3%<br>(40.2-44.7%) | 38.5%<br>(35.3-41.7%) | 32.4%<br>(27.3-36.8%) | 8.1%<br>(4.5-14.9%)   | 8.9%<br>(5.6-13.9%)   | 23.5%<br>(16.1-33.8%) | 80.8%<br>(66.1-89.0%)   |
|                 | With    | 42.3%<br>(40.2-44.7%) | 29.3%<br>(23.0-35.1%) | 22.7%<br>(16.3-29.2%) | 1.8%<br>(0.8-5.0%)    | 30.8%<br>(18.1-45.2%) | 46.3%<br>(32.4-61.2%) | 95.8%<br>(88.4-98.0%)   |
| <b>Slovenia</b> | Without | 16.2%<br>(10.7-21.7%) | 8.2%<br>(0.8-15.4%)   | 0.4%<br>(0.0-7.3%)    | <0.05%                | 48.8%<br>(28.0-92.7%) | 97.4%<br>(65.5-99.9%) | 99.9%<br>(99.8-100.0%)  |
|                 | With    | 16.2%<br>(10.7-21.7)  | 3.4%<br>(0.1-8.6%)    | 0.1%<br>(0.0-1.7%)    | <0.05%                | 78.6%<br>(57.3-99.0%) | 99.5%<br>(91.8-99.9%) | 100.0%<br>(99.9-100.0%) |
| <b>Sweden</b>   | Without | 60.0%<br>(57.4-62.9%) | 58.9%<br>(55.8-62.1%) | 56.8%<br>(52.5-60.4%) | 31.3%<br>(25.1-38.0%) | 1.8%<br>(1.1-3.8%)    | 5.2%<br>(3.3-10.4%)   | 47.9%<br>(38.6-57.2%)   |
|                 | With    | 60.0%<br>(57.4-62.9%) | 41.4%<br>(34.1-47.8%) | 38.7%<br>(31.1-45.6%) | 9.9%<br>(3.6-17.3%)   | 31.1%<br>(21.6-42.8%) | 35.5%<br>(25.3-47.9%) | 83.5%<br>(72.1-93.9%)   |

Table S2b: Table showing HCV incidence per 100 person years at baseline in 2016 and under the different scenarios in 2026 both with and without scale-up of OST and NSP to 80% coverage if not already achieved. The relative decrease between 2016 and 2026 in chronic HCV prevalence is also given. Values are the median and 95% credibility interval

| Site           | With/without scale-up of OST/NSP | HCV incidence per 100pyrs |                       |                                    |                                             | Relative decrease 2016 - 2026 |                              |                               |
|----------------|----------------------------------|---------------------------|-----------------------|------------------------------------|---------------------------------------------|-------------------------------|------------------------------|-------------------------------|
|                |                                  | 2016                      | 2026 – switch to DAAs | 2026 – Switch and double treatment | 2026 – Switch to DAA and treat 50/1000 PWID | Switch to DAAs                | Switch and double treatments | Switch and treat 50/1000 PWID |
| Amsterdam      | Without                          | 1.9<br>(1.1-2.7)          | 0.9<br>(0.4-1.8)      | 0.8<br>(0.4-1.7)                   | <0.05                                       | 52.6%<br>(29.2-66.5%)         | 56.4%<br>(33.0-70.3%)        | 99.7%<br>(98.3-99.9%)         |
|                | With                             | 1.9<br>(1.1-2.7)          | 0.5<br>(0.2-1.1)      | 0.4<br>(0.2-1.1)                   | <0.01                                       | 70.3%<br>(50.0-82.2%)         | 72.9%<br>(53.1-84.1%)        | 99.9%<br>(99.6-100.0%)        |
| Belgium        | Without                          | 7.1<br>(3.5-11.7)         | 6.8<br>(3.2-11.4)     | 6.3<br>(2.9-10.9)                  | 2.4<br>(0.9-5.0)                            | 4.2%<br>(2.2-7.7%)            | 10.6%<br>(6.6-17.2%)         | 64.4%<br>(52.2-79.8%)         |
|                | With                             | 7.1<br>(3.5-11.7)         | 1.4<br>(0.8-2.7)      | 1.2<br>(0.6-2.4)                   | <0.05                                       | 78.9%<br>(63.8-89.7%)         | 81.8%<br>(68.1-91.5%)        | 99.8%<br>(99.3-99.9%)         |
| Czech Republic | Without                          | 5.6<br>(3.3-8.4)          | 3.5<br>(1.8-6.0)      | 0.5<br>(0.1-2.1)                   | <0.05                                       | 37.8%<br>(28.2-49.7%)         | 91.6%<br>(78.5-98.2%)        | 99.9%<br>(99.7-99.9%)         |
|                | With                             | 5.6<br>(3.3-8.4)          | 2.0(0.8-4.2)          | 0.1<br>(0.0-0.9)                   | <0.05                                       | 62.0%<br>(42.6-82.8%)         | 97.7%<br>(86.7-99.5%)        | 99.9%<br>(99.8-100.0%)        |
| Denmark        | Without                          | 10.7<br>(6.4-15.9)        | 9.9<br>(5.8-15.0)     | 8.8<br>(5.0-13.7)                  | 1.9<br>(0.8-4.2)                            | 7.3%<br>(5.0-10.3%)           | 17.4%<br>(12.6-23.4%)        | 82.3%<br>(72.3-89.5%)         |
|                | With                             | 10.7<br>(6.4-15.9)        | 3.1<br>(1.7-5.7)      | 2.5<br>(1.4-4.8)                   | 0.1<br>(0.0-0.2)                            | 69.5%<br>(51.5-83.0%)         | 75.1%<br>(59.3-87.2%)        | 99.2%<br>(97.9-99.7%)         |
| Finland        | Without                          | 19.8<br>(13.3-27.1)       | 19.7<br>(13.3-27.0)   | 19.7<br>(13.2-26.9)                | 8.5<br>(4.6-14.0)                           | 0.1%<br>(0.1-0.2%)            | 0.5%<br>(0.3-0.6%)           | 57.0%<br>(47.6-66.7%)         |



|                 |         |                     |                     |                     |                    |                       |                        |                        |
|-----------------|---------|---------------------|---------------------|---------------------|--------------------|-----------------------|------------------------|------------------------|
|                 | With    | 19.8<br>(13.3-27.1) | 11.5<br>(7.5-17.0)  | 11.5<br>(7.4-17.0)  | 3.2<br>(1.2-6.4)   | 41.0%<br>(26.1-57.6%) | 41.2%<br>(26.4-57.8%)  | 83.4%<br>(72.3-93.3%)  |
| <b>France</b>   | Without | 17.0<br>(9.5-26.2)  | 15.9<br>(8.4-25.4)  | 10.7<br>(2.4-19.5)  | 9.5<br>(2.9-20.8)  | 5.9%<br>(2.0-16.0%)   | 33.2%<br>(15.0-83.1%)  | 44.0%<br>(19.2-70.6%)  |
|                 | With    | 17.0<br>(9.5-26.2)  | 7.4<br>(3.8-14.6)   | 3.3<br>(0.3-9.4)    | 2.2<br>(0.4-8.0)   | 54.1%<br>(32.6-74.1%) | 78.5%<br>(50.8-98.4%)  | 87.2%<br>(64.6-97.0%)  |
| <b>Hamburg</b>  | Without | 10.1<br>(6.9-13.6)  | 9.3<br>(6.2-12.8)   | 8.1<br>(5.3-11.5)   | 3.1<br>(1.5-5.6)   | 7.5%<br>(5.6-10.0%)   | 19.0%<br>(15.2-23.6%)  | 68.7%<br>(57.7-80.0%)  |
|                 | With    | 10.1<br>(6.9-13.6%) | 3.2<br>(3.9-9.5)    | 5.2<br>(3.3-8.3)    | 1.2<br>(0.4-3.0)   | 37.2%<br>(19.3-53.2%) | 46.5%<br>(29.8-60.8%)  | 87.5%<br>(74.9-97.6%)  |
| <b>Norway</b>   | Without | 11.9<br>(7.1-17.3)  | 11.0<br>(6.5-16.4)  | 9.9<br>(5.6-15.0)   | 2.5<br>(0.9-5.4)   | 6.6%<br>(4.2-10.6%)   | 16.1%<br>(11.2-24.4%)  | 79.1%<br>(67.4-88.9%)  |
|                 | With    | 11.9<br>(7.1-17.3)  | 3.3<br>(1.9-6.2)    | 2.7<br>(1.5-5.3)    | 0.1<br>(0.0-0.2)   | 71.0%<br>(52.3-83.9%) | 76.2%<br>(58.8-87.9%)  | 99.4%<br>(98.0-99.8%)  |
| <b>Scotland</b> | Without | 13.8<br>(7.7-20.0)  | 12.6<br>(6.8-18.8)  | 10.6<br>(5.5-16.5)  | 2.8<br>(1.0-6.9)   | 8.7%<br>(5.5-13.6%)   | 22.9%<br>(15.8-33.0%)  | 79.5%<br>(64.8-88.2%)  |
|                 | With    | 13.8<br>(7.7-20.0)  | 6.8<br>(3.8-12.2)   | 5.3<br>(2.9-10.1)   | 0.4<br>(0.2-1.7)   | 48.0%<br>(26.3-64.7%) | 59.4%<br>(39.5-74.4%)  | 98.7%<br>(89.9-98.6%)  |
| <b>Slovenia</b> | Without | 2.6<br>(1.3-4.8)    | 1.3<br>(0.1-3.3)    | 0.1<br>(0.0-1.5)    | <0.01              | 48.5%<br>(27.7-92.6%) | 97.3%<br>(65.3-99.9%)  | 99.9%<br>(99.8-100.0%) |
|                 | With    | 2.6<br>(1.3-4.8)    | 0.3<br>(0.0-0.9)    | <0.5                | <0.01              | 89.2%<br>(73.6-99.5%) | 99.7%<br>(95.3-100.0%) | 100.0%                 |
| <b>Sweden</b>   | Without | 19.9<br>(13.7-26.4) | 19.2<br>(13.4-26.0) | 18.5<br>(12.7-25.2) | 10.4<br>(6.1-16.2) | 1.8%<br>(1.0-3.7%)    | 5.1%<br>(3.2-9.9%)     | 46.9%<br>(37.9-56.2%)  |
|                 | With    | 19.6<br>(13.7-26.4) | 6.8<br>(4.2-10.8)   | 6.4<br>(3.9-10.2)   | 1.7<br>(0.5-4.0)   | 64.6%<br>(50.1-77.5%) | 66.7%<br>(52.3-79.0%)  | 91.0%<br>(80.9-97.5%)  |

*Table S3: Table showing relative decrease in HCV prevalence between 2016 and 2026 if switching to DAAs without and with scale-up of OST and NSP coverage to 80%, and the differential impact scaling-up OST and NSP to 80% coverage has on the relative decrease in chronic prevalence.*

| <b>Site</b>           | <b>Relative decrease in prevalence if current OST and NSP coverage</b> | <b>Relative decrease in prevalence if OST and NSP coverage is scaled-up to 80% coverage</b> | <b>Differential benefit of scaling-up OST and NSP on relative decrease</b> |
|-----------------------|------------------------------------------------------------------------|---------------------------------------------------------------------------------------------|----------------------------------------------------------------------------|
| <b>Amsterdam</b>      | 51.8% (28.7-65.7%)                                                     | 56.4% (35.0-68.4%)                                                                          | 1.1 (1.0-1.3)                                                              |
| <b>Belgium</b>        | 4.4% (2.2-8.0%)                                                        | 48.4% (31.2-65.7%)                                                                          | 11.0 (4.7-25.8)                                                            |
| <b>Czech Republic</b> | 37.8% (28.2-49.8%)                                                     | 55.8% (39.7-74.7%)                                                                          | 1.4 (1.1-2.2)                                                              |
| <b>Denmark</b>        | 7.6% (5.2-10.8%)                                                       | 43.5% (29.9-59.6%)                                                                          | 5.7 (3.2-9.9)                                                              |
| <b>Finland</b>        | 0.1% (0.1-0.2%)                                                        | 17.6% (10.0-27.9%)                                                                          | 146.7 (67.2-312.2)                                                         |
| <b>France</b>         | 6.7% (2.3-18.1%)                                                       | 35.5% (19.7-57.5%)                                                                          | 5.1 (2.1-14.4)                                                             |
| <b>Hamburg</b>        | 7.50% (5.3-10.1%)                                                      | 19.5% (11.7-27.6%)                                                                          | 2.5 (1.5-4.3)                                                              |
| <b>Norway</b>         | 6.7% (4.2-10.8%)                                                       | 43.3% (28.8-59.4%)                                                                          | 6.4 (3.3-12.2)                                                             |
| <b>Scotland</b>       | 8.9% (5.6-13.9%)                                                       | 30.8% (18.1-45.2%)                                                                          | 3.4 (1.8-6.7)                                                              |
| <b>Slovenia</b>       | 48.8% (28.0-92.7%)                                                     | 78.6% (57.3-99.0%)                                                                          | 1.6 (1.1-2.4)                                                              |
| <b>Sweden</b>         | 1.8% (1.1-3.8%)                                                        | 31.1% (21.6-42.8%)                                                                          | 16.5 (7.7-32.8)                                                            |

Figure S1 shows the median incidence per 100 person years among PWID in Sweden, France, Czech republic, Finland and Scotland. At each of the sites the data is comparable with the model estimates; this is especially true as some of the estimates are for cities or larger areas rather than country wide. Confidence bounds from the data are given if possible.

Figures S2 and S3 show the projected 10-year HCV incidence per 100 person years among PWID in multiple sites in Europe for different levels of scale-up of HCV treatment with new DAAs if current coverage of OST and NSP are maintained or OST and NSP are scaled-up to 80% coverage respectively.

Figure S4 shows the results of the sensitivity analysis for each site. The figures show the proportion of the uncertainty each parameter contributes to the variation in the decrease in chronic prevalence and incidence between 2016 and 2026 when current treatment rates are doubled with new DAAs for each of the different sites. Note that only parameters which contribute more than 1% to the variation at each site are shown; all other parameters are grouped together.

**Figure S1:** Incidence per 100 person years in (a) Sweden, (b) France, (c) Czech Republic, (d) Finland and (e) Scotland. Figures show median and 95% credibility intervals from the 2,500 runs for each site that were fit to prevalence estimates only. The dots (and lines if data available) show the mean and 95% confidence interval from data for each of the sites.

(a) Projected incidence in Sweden

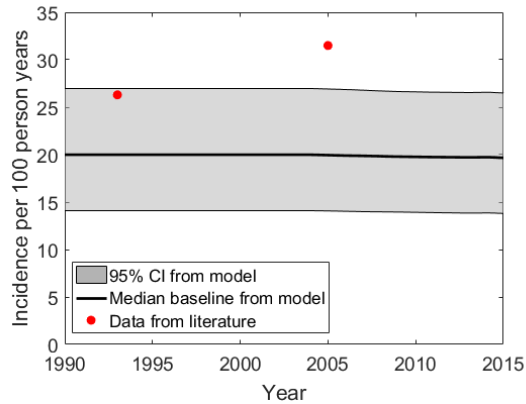

(b) Projected incidence in France

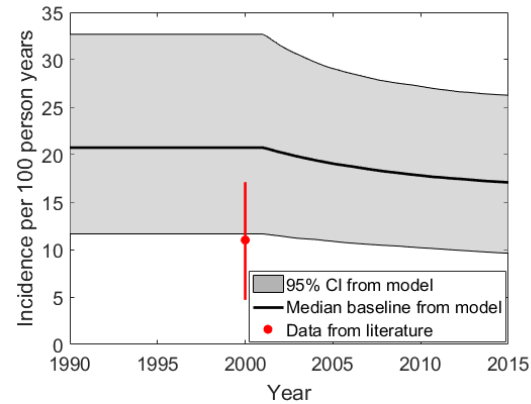

(c) Projected incidence in Czech Republic

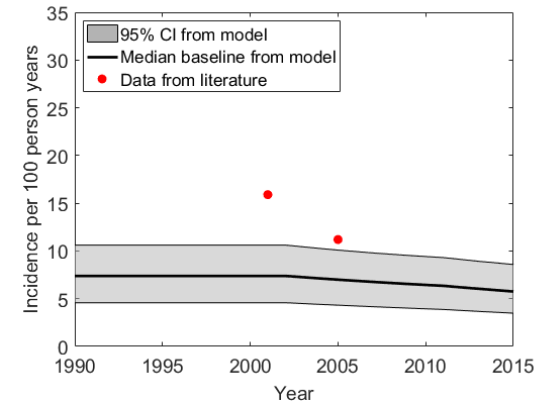

(d) Projected incidence in Finland

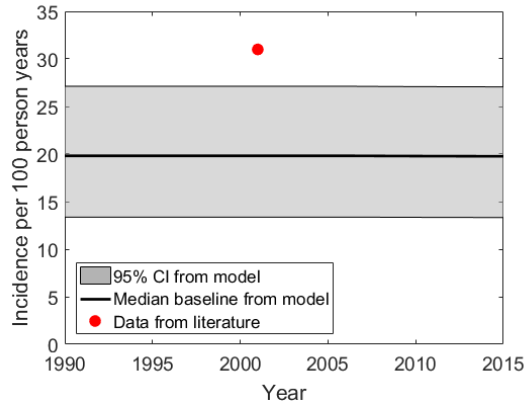

(e) Projected incidence in Scotland

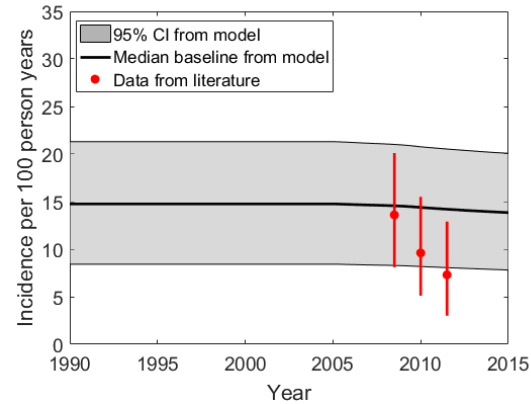

**Figure S2:** Baseline and projected 10 year incidence per 100 person years among PWID in multiple sites in Europe if either current treatment rates continue with new DAAs (green boxes), treatment rates are doubled (yellow boxes), or 50 per 1000 PWID are treated annually (pink boxes) with OST and NSP at current coverage. Bars indicate the median and interquartile range and whiskers show the 95% credibility intervals of the uncertainty analysis. \$ z-score < 0.5 (unlikely to observe a difference between 2016 and 2026), + z-score 0.5-1.5 (may be able to observe a difference between 2016 and 2026), \* z-score 1.5-3 (increasingly likely to be able to observe and difference between 2016 and 2026), #z-score >3 (highly likely to be able to observe a difference between 2016 and 2026).

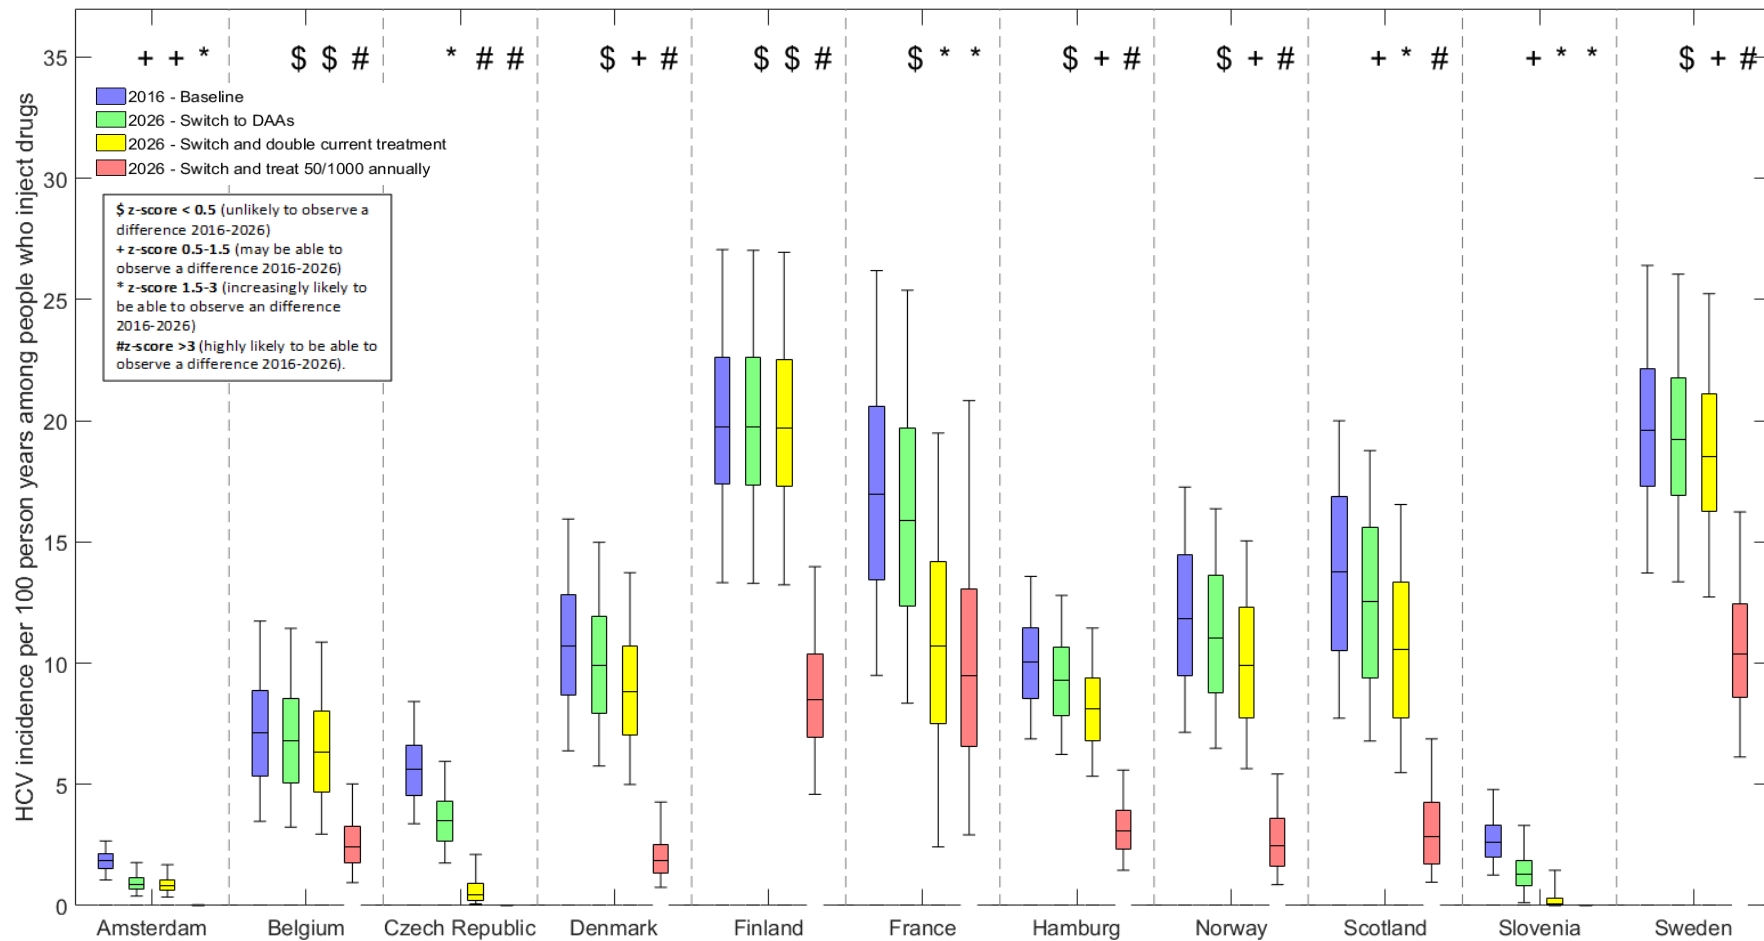

**Figure S3:** Baseline and projected 10 year incidence per 100 person years among PWID in multiple sites in Europe if either current treatment rates continue with new DAAs (green boxes), treatment rates are doubled (yellow boxes), or 50 per 1000 PWID are treated annually (pink boxes) with OST and NSP scaled-up to 80% coverage. Bars indicate the median and interquartile range and whiskers show the 95% credibility intervals of the uncertainty analysis. \$ z-score < 0.5 (unlikely to observe a difference between 2016 and 2026), + z-score 0.5-1.5 (may be able to observe a difference between 2016 and 2026), \* z-score 1.5-3 (increasingly likely to be able to observe and difference between 2016 and 2026), #z-score >3 (highly likely to be able to observe a difference between 2016 and 2026).

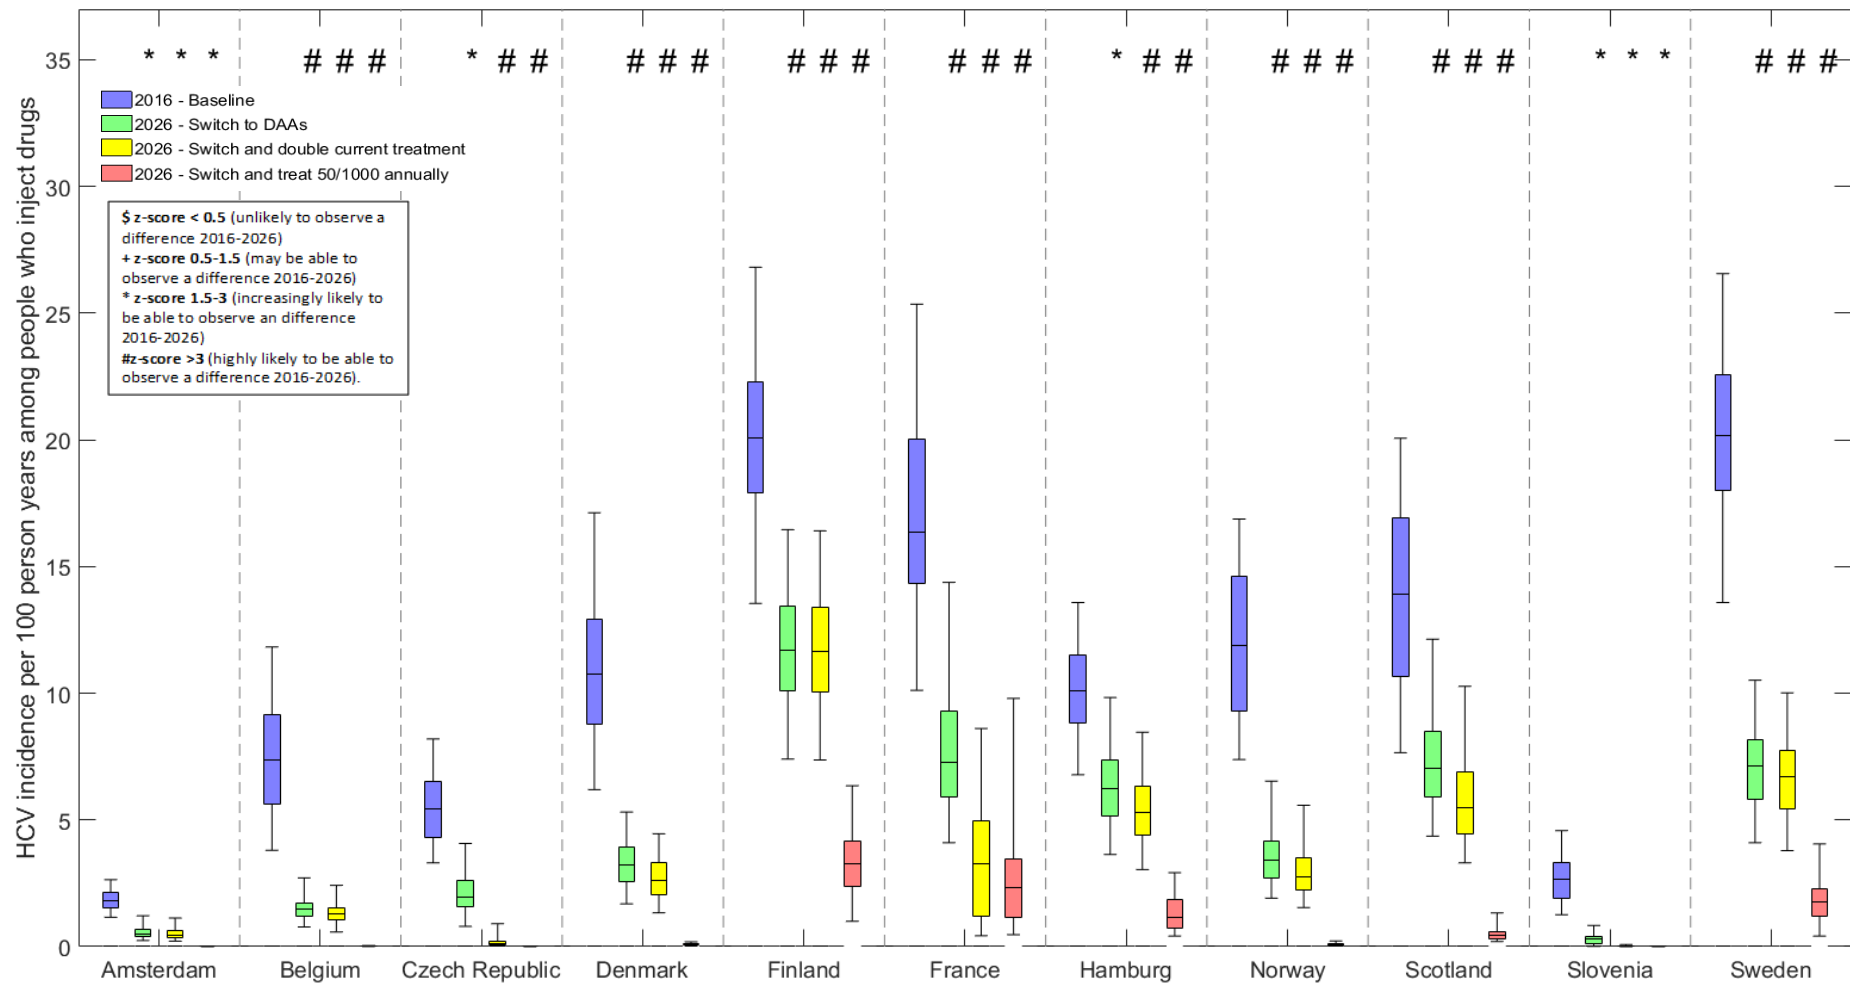

**Figure S4:** Results of the sensitivity analysis for each site showing the proportion of the uncertainty in relative chronic prevalence decrease and relative incidence decrease between 2016 and 2026 with OST and NSP at current coverage resulting from uncertainty in each parameter for (a) Amsterdam, (b) Belgium, (c) Czech Republic, (d) Denmark, (e) Finland, (f) France, (g) Hamburg, (h) Norway, (i) Scotland, (j) Slovenia and (k) Sweden.

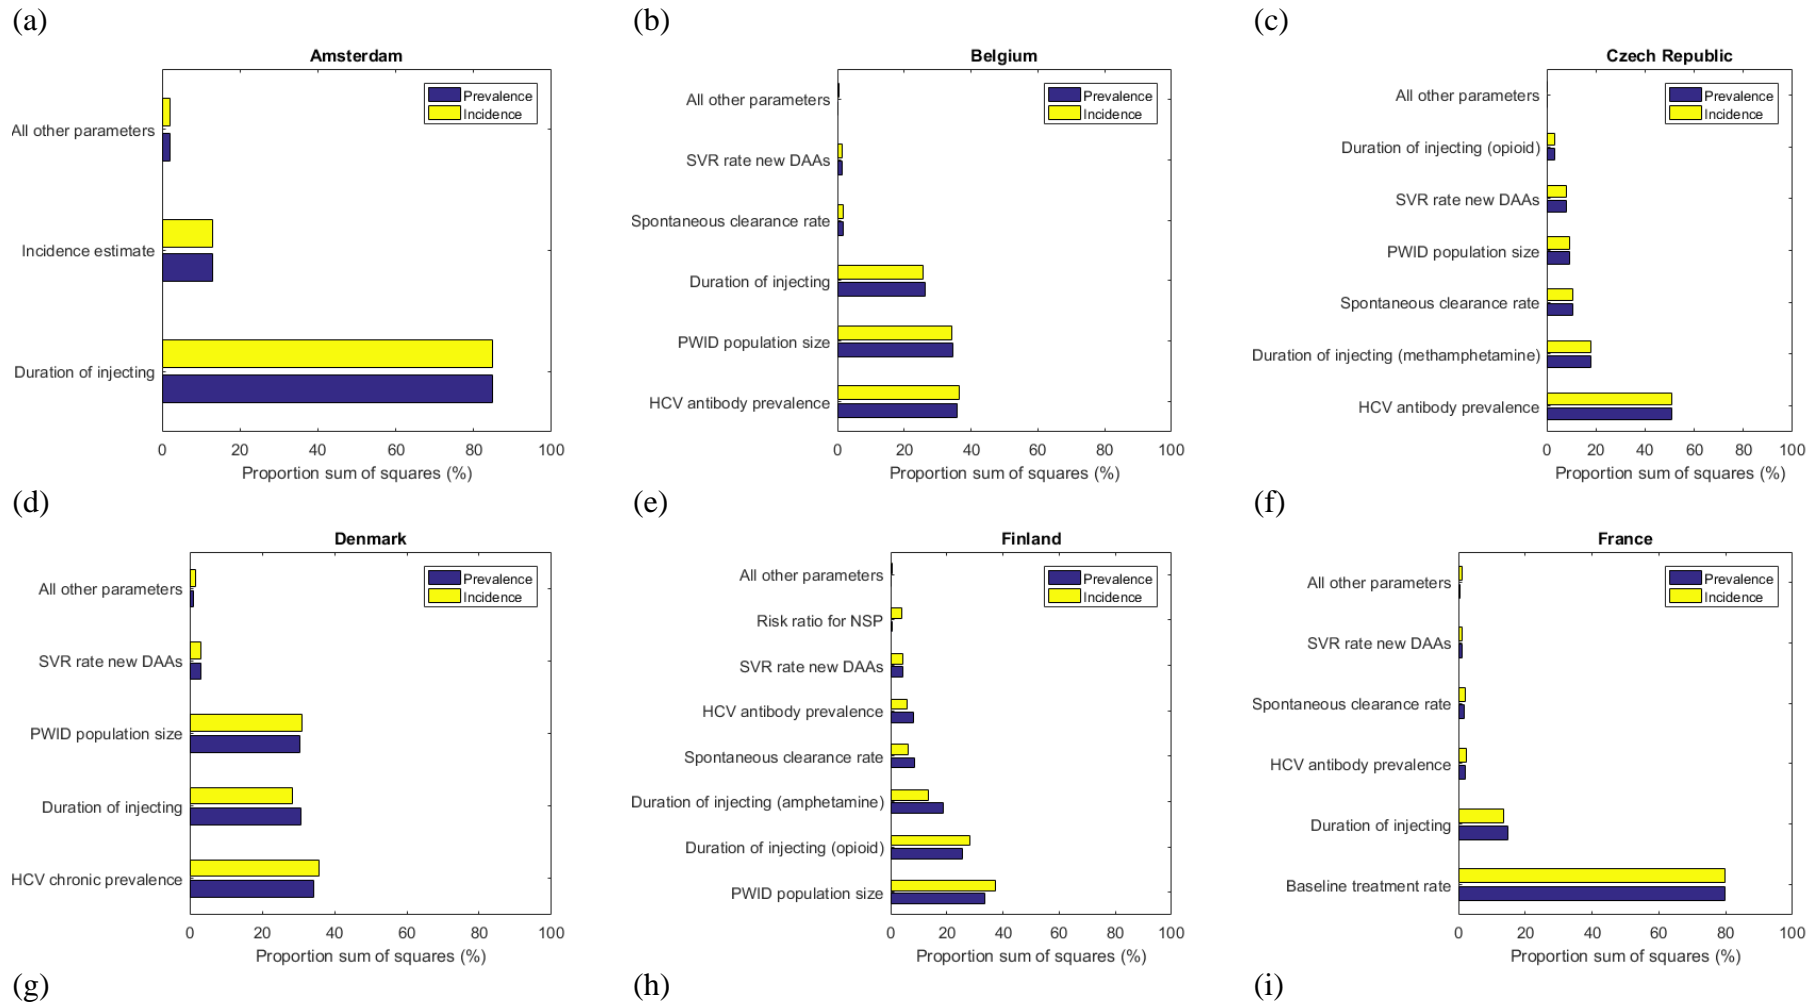

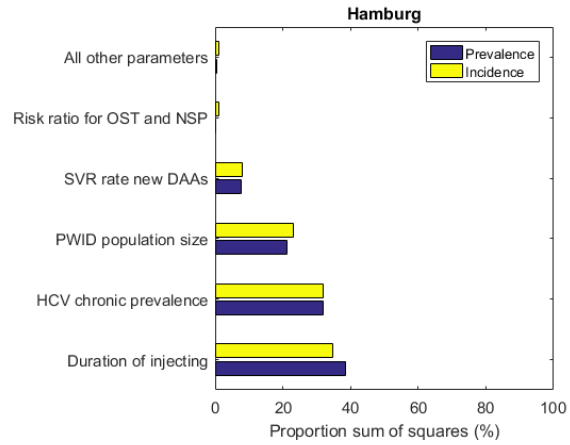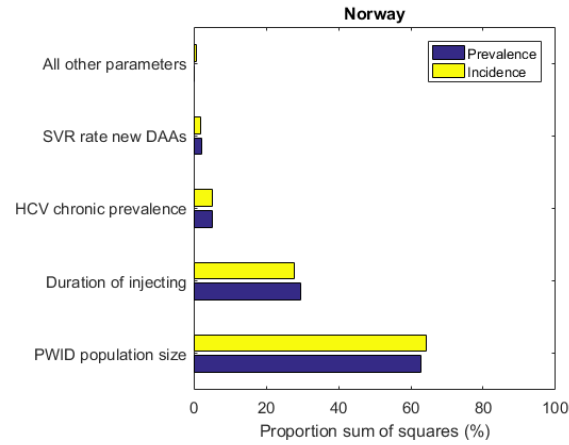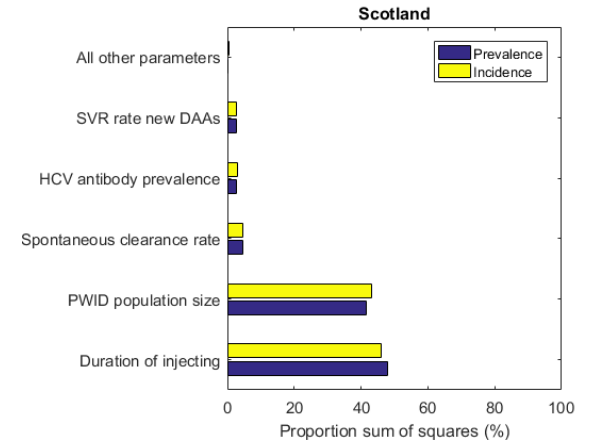

(j)

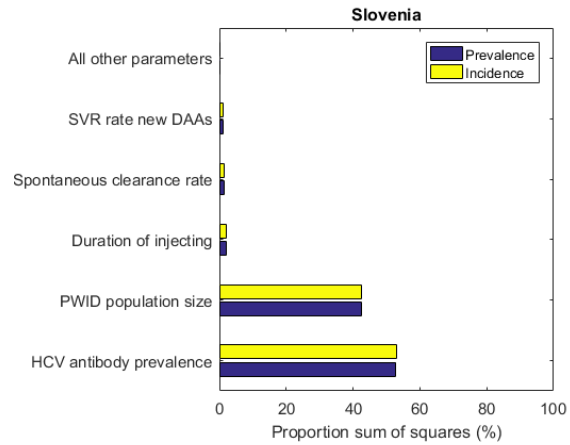

(k)

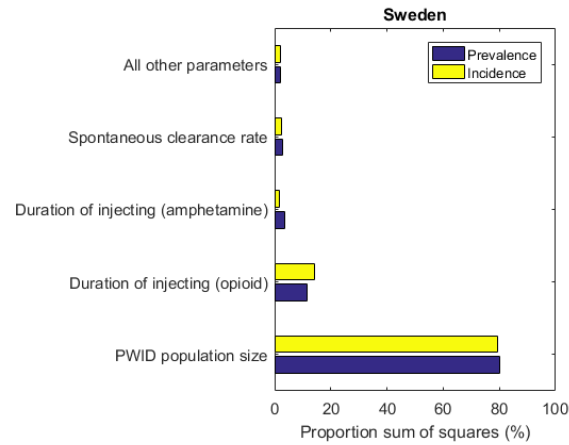



#### **4. References**

1. VICKERMAN P., MARTIN N., TURNER K., HICKMAN M. Can needle and syringe programmes and opiate substitution therapy achieve substantial reductions in hepatitis C virus prevalence? Model projections for different epidemic settings, *Addiction* 2012: 107: 1984-1995.
2. MARTIN N. K., HICKMAN M., HUTCHINSON S. J., GOLDBERG D. J., VICKERMAN P. Combination Interventions to Prevent HCV Transmission Among People Who Inject Drugs: Modeling the Impact of Antiviral Treatment, Needle and Syringe Programs, and Opiate Substitution Therapy, *Clinical Infectious Diseases* 2013: 57: S39-S45.
3. MARTIN N. K., VICKERMAN P., GREBELY J., HELLARD M., HUTCHINSON S., LIMA V. et al. HCV treatment for prevention among people who inject drugs: modeling treatment scale-up in the age of direct-acting antivirals, *Hepatology* 2013: 58: 1598-1609.
4. VICKERMAN P., GREBELY J., DORE G. J., SACKS-DAVIS R., PAGE K., L THOMAS D. et al. The more you look, the more you find: effects of hepatitis C virus testing interval on reinfection incidence and clearance and implications for future vaccine study design, *J Infect Dis* 2012: 205: 1342-1350.
5. SIMMONS B., SALEEM J., HILL A., RILEY R. D., COOKE G. S. Risk of late relapse or reinfection with hepatitis C virus after achieving a sustained virological response: a systematic review and meta-analysis, *Clin Infect Dis* 2016: civ948.
6. MIDGARD H., BJØRO B., MÆLAND A., KONOPSKI Z., KILENG H., DAMÅS J. K. et al. Hepatitis C reinfection after sustained virological response, *Journal of hepatology* 2016: 64: 1020-1026.
7. MARTIN N. K., VICKERMAN P., FOSTER G. R., HUTCHINSON S. J., GOLDBERG D. J., HICKMAN M. Can antiviral therapy for hepatitis C reduce the prevalence of HCV among injecting drug user populations? A modeling analysis of its prevention utility, *J Hepatol* 2011: 54: 1137-1144.
8. MARTIN N. K., VICKERMAN P., HICKMAN M. Mathematical modelling of hepatitis C treatment for injecting drug users, *J Theor Biol* 2011: 274: 58-66.
9. VAN SANTEN D. K., VAN DER HELM J. J., GRADY B. P., DE VOS A. S., KRETZSCHMAR M. E., STOLTE I. G. et al. Temporal trends in mortality among people who use drugs compared with the general Dutch population differ by hepatitis C virus and HIV infection status, *AIDS* 2014: 28: 2589-2599.
10. VAN DE LAAR T. J., LANGENDAM M. W., BRUISTEN S. M., WELP E. A., VERHAEST I., VAN AMEIJDEN E. J. et al. Changes in risk behavior and dynamics of hepatitis C virus infections among young drug users in Amsterdam, the Netherlands, *J Med Virol* 2005: 77: 509-518.
11. LINDENBURG C. E., LAMBERS F. A., URBANUS A. T., SCHINKEL J., JANSEN P. L., KROL A. et al. Hepatitis C testing and treatment among active drug users in Amsterdam: results from the DUTCH-C project, *Eur J Gastroenterol Hepatol* 2011: 23: 23-31.
12. MATSER A., URBANUS A., GESKUS R., KRETZSCHMAR M., XIRIDOU M., BUSTER M. et al. The effect of hepatitis C treatment and human immunodeficiency virus (HIV) co-infection on the disease burden of hepatitis C among injecting drug users in Amsterdam, *Addiction* 2012: 107: 614-623.
13. VAN SANTEN D. K., DE VOS A. S., MATSER A., WILLEMSE S. B., LINDENBURG K., KRETZSCHMAR M. E. et al. Cost-effectiveness of hepatitis C treatment for people who inject drugs and the impact of the type of epidemic; extrapolating from Amsterdam, the Netherlands, *PLoS One* 2016: 11: e0163488.
14. SCHREUDER I., VAN DER SANDE M. A., DE WIT M., BONGAERTS M., BOUCHER C. A., CROES E. A. et al. Seroprevalence of HIV, hepatitis b, and hepatitis c among opioid drug users on methadone treatment in the netherlands, *Harm reduction journal* 2010: 7: 1.
15. MATHEÏ C., VAN DOOREN S., LEMEY P., VAN DAMME P., BUNTINX F., VANDAMME A. M. The epidemic history of hepatitis C among injecting drug users in Flanders, Belgium, *Journal of viral hepatitis* 2008: 15: 399-408.

16. ARAIN A., ET AL. In preparation, 2016.
17. MATHEÏ C., BOURGEOIS S., BLACH S., BRIKKO C., MULKAY J.-P., RAZAVI H. et al. Mitigating the burden of hepatitis C virus among people who inject drugs in Belgium, *Acta gastro-enterologica Belgica* 2016: 79: 227.
18. PLETTINCKX E., ANTOINE J., BLANCKAERT P., VAN BUSSEL J. Belgian National Report on Drugs 2013; 2013.
19. FÜLEOVÁ A., ZÓNOVÁ J., PETRÁŠOVÁ B. Výroční zpráva: Incidence, prevalence, zdravotní dopady a trendy léčených uživatelů drog v České republice v roce 2014. Praha: Hygienická stanice hl m Prahy, referát drogové epidemiologie; 2015.
20. LEJCKOVÁ P., MRAVČÍK V. Umrtnost uzivatele drog v ČR Souhrn výsledku kohortové studie [Mortality of drug users. Summary of cohort study results], *Epidemiol Mikrobiol Imunol* 2005: 54: 154-160.
21. ZÁBRANSKÝ T., MRAVČÍK V., CHOMYNOVÁ P. Overall mortality of drug users in the Czech Republic. In: EMCDDA e., editor, Prague / Lisbon: ResAd ResAd/EMCDDA; 2009.
22. LEJČKOVÁ P., MRAVČÍK V. Mortality of hospitalized drug users in the Czech Republic, *Journal of Drug Issues* 2007: 37: 103-118.
23. KREKULOVA L., REHAK V., STRUNECKÝ O., NĚMECEK V. [Current situation and trends in the hepatitis C virus genotype distribution among injecting drug users in the Czech Republic], *Epidemiologie, mikrobiologie, imunologie: casopis Spolecnosti pro epidemiologii a mikrobiologii Ceske lekarske spolecnosti JE Purkyne* 2009: 58: 84-89.
24. HUSA P., SLESINGER P., STROBLOVA H., SVOBODNÍK A., HUSOVÁ L. Efficacy of pegylated interferon alpha-2a and ribavirin treatment in chronic hepatitis C patients depends on various baseline parameters and early viral kinetics, *International Journal of Infectious Diseases* 2008: 12: e420-e421.
25. MRAVČÍK V., ET AL. Výroční zpráva o stavu ve věcech drog v České republice v roce 2014 [Annual Report on Drug Situation 2014 - the Czech Republic], Praha: Úřad vlády České republiky; 2015.
26. ZABRANSKY T., MRAVCIK V., KORCIŠOVA B., REHAK V. Hepatitis C virus infection among injecting drug users in the Czech Republic—prevalence and associated factors, *Eur Addict Res* 2006: 12: 151-160.
27. MRAVČÍK V., P. C., K. G., V. N., L. G., L. K. et al. Výroční zpráva o stavu ve věcech drog v České republice v roce 2013 [Annual Report on Drug Situation 2013 – Czech Republic]. In: MRAVČÍK V., editor, Praha: Úřad vlády České republiky; 2014.
28. MRAVČÍK V., STRADA L., REIMER J., SCHULTE B. Hepatitis C treatment uptake and adherence among injecting drug users in the Czech Republic, *Epidemiologie, mikrobiologie, imunologie: casopis Spolecnosti pro epidemiologii a mikrobiologii Ceske lekarske spolecnosti JE Purkyne* 2014: 63: 265-269.
29. MRAVČÍK V. Léčba VHC u injekčních uživatelů drog v ČR – průzkum mezi centry pro léčbu virových hepatitid, *Adiktologie* 2012: 12: 10-22.
30. NECHANSKÁ B. Informace z Národního registru uživatelů lékařsky indikovaných substitučních látek - rok 2014, nepublikováno [Data from National Register of Substitution Treatment, unpublished]. ÚZIS ČR: Praha; 2015.
31. MOESSNER B. K., SKAMLING M., JØRGENSEN T. R., GEORGENSEN J., PEDERSEN C., CHRISTENSEN P. Decline in hepatitis B infection observed after 11 years of regional vaccination among Danish drug users, *Journal of medical virology* 2010: 82: 1635-1639.
32. CHRISTENSEN P. B., KRINGSHOLM B., BANNER J., THOMSEN J. L., COWAN S., STEIN G. F. et al. Surveillance of HIV and viral hepatitis by analysis of samples from drug related deaths, *Eur J Epidemiol* 2006: 21: 383-387.

33. OMLAND L., JEPSEN P., WEIS N., CHRISTENSEN P. B., LAURSEN A. L., NIELSEN H. et al. Mortality in HIV-infected injection drug users with active vs cleared hepatitis C virus-infection: a population-based cohort study, *Journal of viral hepatitis* 2010: 17: 261-268.
34. HANSEN N., OBEL N., CHRISTENSEN P. B., KJAER M., LAURSEN A. L., KRARUP H. B. et al. Effectiveness of treatment with pegylated interferon and ribavirin in an unselected population of patients with chronic hepatitis C: a Danish nationwide cohort study, *BMC Infect Dis* 2011: 11: 177.
35. MOSSNER B. K., SKAMLING M., JORGENSEN T. R., GEORGSSEN J., PEDERSEN C., CHRISTENSEN P. B. Decline in hepatitis B infection observed after 11 years of regional vaccination among Danish drug users, *J Med Virol* 2010: 82: 1635-1639.
36. CHRISTENSEN P. B. [Epidemiology of hepatitis C], *Ugeskrift for laeger* 1998: 160: 3529-3532.
37. CHRISTENSEN P. B., HAY G., JEPSEN P., OMLAND L. H., JUST S. A., KRARUP H. B. et al. Hepatitis C prevalence in Denmark-an estimate based on multiple national registers, *BMC infectious diseases* 2012: 12: 1.
38. CHRISTENSEN P. B., HAY G., JEPSEN P., OMLAND L. H., JUST S. A., KRARUP H. B. et al. Hepatitis C prevalence in Denmark -an estimate based on multiple national registers, *BMC infectious diseases* 2012: 12: 178.
39. MATHERS B. M., DEGENHARDT L., BUCELLO C., LEMON J., WIESSING L., HICKMAN M. Mortality among people who inject drugs: a systematic review and meta-analysis, *Bull World Health Organ* 2013: 91: 102-123.
40. SILLANPÄÄ M., HUOVINEN E., VIRTANEN M. J., TOIKKANEN S., SURCEL H.-M., JULKUNEN I. et al. Hepatitis C infection surveillance in Finland in 1995-2013, Helsinki, Finland 2014: National Institute for Health and Welfare (THL); 2014.
41. OLLGREN J., FORSELL M., VARJONEN V., ALHO H., BRUMMER-KORVENKONTIO H., KAINULAINEN H. et al. The prevalence of amphetamine and opioid abuse in Finland in 2012, *Yhteiskuntapolitiikka* 2014: 5: 498-508.
42. PARTANEN A., VORMA H., ALHO H., LEPPÖ A. Detoxification and Substitution in the Treatment of Opioid Addicts in Finland in 2011: Is Treatment Becoming More Varied?, *Finnish” Opioidiriippuvuuden lääkkeellinen vieroitus- ja korvaushoito Suomessa, Suomen Lääkärilehti* 2014: 69: 481-486.
43. LAUNONEN E., WALLACE I., KOTOVIRTA E., ALHO H., SIMOJOKI K. Factors associated with non-adherence and misuse of opioid maintenance treatment medications and intoxicating drugs among Finnish maintenance treatment patients, *Drug and alcohol dependence* 2016: 162: 227-235.
44. BROUARD C., LE STRAT Y., LARSEN C., JAUFFRET-ROUSTIDE M., LOT F., PILLONEL J. The Undiagnosed Chronically-Infected HCV Population in France. Implications for Expanded Testing Recommendations in 2014, *Plos One* 2015: 10.
45. WEILL-BARILLET L., PILLONEL J., SEMAILLE C., LÉON L., LE STRAT Y., PASCAL X. et al. Hepatitis C virus and HIV seroprevalences, sociodemographic characteristics, behaviors and access to syringes among drug users, a comparison of geographical areas in France, ANRS-Coquelicot 2011 survey, *Revue d'epidemiologie et de sante publique* 2016.
46. WENZ B., NIELSEN S., GASSOWSKI M., SANTOS-HÖVENER C., CAI W., ROSS R. S. et al. High variability of HIV and HCV seroprevalence and risk behaviours among people who inject drugs: results from a cross-sectional study using respondent-driven sampling in eight German cities (2011–14), *BMC Public Health* 2016: 16: 927.
47. DIE DROGENBEAUFTRAGTE DER BUNDESREGIERUNG. Zahl der Drogentoten / Rauschgiftlage 2013; 2014.
48. ZIMMERMANN R., MARCUS U., SCHÄFFER D., LEICHT A., WENZ B., NIELSEN S. et al. A multicentre sero-behavioural survey for hepatitis B and C, HIV and HTLV among people who inject drugs in Germany using respondent driven sampling, *BMC Public Health* 2014: 14: 845.

49. REIMER J., SCHMIDT C. S., SCHULTE B., GANSEFORT D., GOLZ J., GERKEN G. et al. Psychoeducation improves hepatitis C virus treatment during opioid substitution therapy: a controlled, prospective multicenter trial, *Clin Infect Dis* 2013; 57 Suppl 2: S97-104.
50. FEDERAL INSTITUTE FOR DRUGS AND MEDICAL DEVICES ((BUNDESINSTITUT FÜR ARZNEIMITTEL UND MEDIZINPRODUKTE B. 2013 Report on Opioid substitution treatment in Germany., 2013
51. BREMER V., CAI W., GASSOWSKI M., HAUBIG J., MARCUS U., NIELSEN S. et al. Drogen und chronische Infektionskrankheiten in Deutschland-DRUCK-Studie, 2016.
52. ROBERT KOCH-INSTITUT. Ergebnisbericht der Studie zu Drogen und chronischen Infektionskrankheiten (DRUCK-Studie) in Hamburg, Berlin; 2015.
53. DALGARD O., EGELAND A., ERVIK R., VILIMAS K., SKAUG K., STEEN T. Risikofaktorer for hepatitt C-smitte blant sprøytemisbrukere101–, *Tidsskrift for Den norske legeforening* 2009; 129: 101-104.
54. CLAUSEN T., WAAL H., THORESEN M., GOSSOP M. Mortality among opiate users: opioid maintenance therapy, age and causes of death, *Addiction* 2009; 104: 1356-1362.
55. ISAKSEN K., AABAKKEN L., GRIMSTAD T., KARLSEN L., SANDVEI P., DALGARD O. Hepatitis C treatment at three Norwegian hospitals 2000-2011, *Tidsskrift for den Norske laegeforening: tidsskrift for praktisk medicin, ny raekke* 2015; 135: 2052.
56. SKRETTEING A., BYE E.K., VEDØY T. F., LUND K. E. Drug use in Norway. In: Research. T. N. I. f. A. a. D., editor. SIRUS report 2015; 2015.
57. MIDGARD H., BRAMNESS J., SKURTVEIT S., HAUKELAND J., DALGARD O. Hepatitis C treatment uptake among patients who have received opioid substitution treatment: A population-based study, Submitted 2016.
58. WAAL H, BUSSEURUD K, CLAUSEN T, SKEIE I, HÅSETH A, H. L. Annual assessment of the Norwegian OMT program 2016. , SERAF, University of Oslo.; 2016.
59. BUKTEN A., RØISLIEN J., SKURTVEIT S., WAAL H., GOSSOP M., CLAUSEN T. A day-by-day investigation of changes in criminal convictions before and after entering and leaving opioid maintenance treatment: a national cohort study, *BMC psychiatry* 2013; 13: 1.
60. MARTIN N. K., FOSTER G. R., VILAR J., RYDER S., CRAMP M. E., GORDON F. et al. HCV treatment rates and sustained viral response among people who inject drugs in seven UK sites: real world results and modelling of treatment impact, *J Viral Hepat* 2015; 22: 399-408.
61. MERRALL E. L., BIRD S. M., HUTCHINSON S. J. Mortality of those who attended drug services in Scotland 1996-2006: record-linkage study, *Int J Drug Policy* 2012; 23: 24-32.
62. MCLEOD A., HUTCHINSON S., GOLDBERG D. Surveillance of known hepatitis C antibody positive cases in Scotland: Results to 31 December 2013; 2014.
63. INNES H. A., HUTCHINSON S. J., ALLEN S., BHATTACHARYYA D., BRAMLEY P., CARMAN B. et al. Ranking predictors of a sustained viral response for patients with chronic hepatitis C treated with pegylated interferon and ribavirin in Scotland, *European journal of gastroenterology & hepatology* 2012; 24: 646-655.
64. OVERSTALL A. M., KING R., BIRD S. M., HUTCHINSON S. J., HAY G. Incomplete contingency tables with censored cells with application to estimating the number of people who inject drugs in Scotland, *Stat Med* 2014; 33: 1564-1579.
65. PALMATEER N. E., TAYLOR A., GOLDBERG D. J., MUNRO A., AITKEN C., SHEPHERD S. J. et al. Rapid decline in HCV incidence among people who inject drugs associated with national scale-up in coverage of a combination of harm reduction interventions, *PLoS One* 2014; 9: e104515.
66. CORNISH R., MACLEOD J., STRANG J., VICKERMAN P., HICKMAN M. Risk of death during and after opiate substitution treatment in primary care: prospective observational study in UK General Practice Research Database, *BMJ* 2010; 341: c5475.

67. REITOX NATIONAL FOCAL POINT. Report on the drug situation 2013 of the republic of Slovenia. In: Drev A., editor, Ljubljana; 2013.
68. SEME K., VRHOVAC M., MOCILNIK T., MATICIC M., LESNICAR G., BAKLAN Z. et al. Hepatitis C virus genotypes in 1,504 patients in Slovenia, 1993-2007, *J Med Virol* 2009; 81: 634-639.
69. BRINOVEC V., LESNICAR G., MATICIC M., MEGLIC-VOLKAR J., POLJAK M., SEME K. et al. Efficacy of chronic hepatitis C therapy with interferon alpha (IFN-alpha) in Slovenia, *Hepato-gastroenterology* 2001; 49: 1320-1325.
70. BRINOVEC V., LESNICAR G., MEGLIC-VOLKAR J., MATICIC M., BAKLAN Z., POLJAK M. et al. Treatment of chronic hepatitis C: our experience, *Hepato-gastroenterology* 2003; 51: 494-499.
71. MATIČIČ M, SELIČ KURINČIČ T, KASTELIC A, POLJAK M, LESNIČAR G, MEGLIČ-VOLKAR J et al. A national multidisciplinary healthcare network for treatment of hepatitis C in people who inject drugs in Slovenia: high enrollment, adherence and sustained virological response. , *Suchtmedizin in Forschung und Praxis* 2013; 15: 245.
72. MATICIC M. A national multidisciplinary healthcare network for treatment of hepatitis C in people who inject drugs in Slovenia, *BMC Infect Dis* 2014; 14 Suppl 6: S6.
73. JERKEMAN A., NORKRANS G., LIDMAN C., WESTIN J., LAGGING M., FRIMAND J. et al. Treatment for chronic hepatitis C in a cohort of opiate substitution therapy recipients in three Swedish cities - completion rates and efficacy, *Eur J Gastroenterol Hepatol* 2014; 26: 523-531.
74. ASPINALL E. J., CORSON S., DOYLE J. S., GREBELY J., HUTCHINSON S. J., DORE G. J. et al. Treatment of hepatitis C virus infection among people who are actively injecting drugs: a systematic review and meta-analysis, *Clin Infect Dis* 2013; 57 Suppl 2: S80-89.
75. CENTRALFÖRBUNDET FÖR ALKOHOL- OCH NARKOTIKAUPPLYSNING C. Drogutvecklingen i Sverige 2011.
76. SWEDISH BOARD OF HEALTH AND WELFARE. En uppskattning om omfattningen av injektionsmissbruket I Sverige, Socialstyrelsen, 2013.
77. SOCIALDEPARTEMENTET. Bättre insatser vid missbruk och beroende, Socialdepartementet 2011.
78. SOCIALSTYRELSEN. Öppna jämförelser 2014 Missbruks- och beroendevården; 2014.
79. MICALLEF J. M., KALDOR J. M., DORE G. J. Spontaneous viral clearance following acute hepatitis C infection: a systematic review of longitudinal studies, *J Viral Hepat* 2006; 13: 34-41.
80. TURNER K. M., HUTCHINSON S., VICKERMAN P., HOPE V., CRAINE N., PALMATEER N. et al. The impact of needle and syringe provision and opiate substitution therapy on the incidence of hepatitis C virus in injecting drug users: pooling of UK evidence, *Addiction* 2011; 106: 1978-1988.
81. NICE. Elbasvir–grazoprevir for treating chronic hepatitis C; 2016.
82. NICE. Sofosbuvir–velpatasvir for treating chronic hepatitis C; 2016.
83. NICE. Peginterferon alfa and ribavirin for the treatment of mild chronic hepatitis C; 2013.
